# Supplementary material
Source: PubMed Central journal article supplement (PMC6044061)
Supplement: fj.201701347R.sd1.pdf [file fj.201701347R.sd1.pdf]

## **SUPPLEMENTAL MATERIAL**

### **TITLE : Identification of binding sites contributing to volatile anesthetic effects on $\gamma$ -aminobutyric acid type A receptors**

Kellie A. Woll, Xiaojuan Zhou, Natarajan V. Bhanu, Benjamin A. Garcia<sup>c</sup>, Manuel Covarrubias , Keith W. Miller, and Roderic G. Eckenhoff\*

#### Table of contents

|            | Page   |
|------------|--------|
| Table 1    | 2      |
| Table 2    | 3      |
| Fig S1-S36 | 4-39 4 |

Table S1. Azidoflurane photolabeled residues in FLAG- $\alpha_1\beta_3$  and FLAG- $\alpha_1\beta_3\gamma_2$ -L3-1D4 GABA<sub>A</sub> receptors and corresponding residues within  $\alpha_1\beta_3$  and  $\alpha_1\beta_3\gamma_2$  GABA<sub>A</sub> receptors.

| <b><math>\alpha\beta</math> GABA<sub>A</sub> receptor</b>       |                                                   |                                     |
|-----------------------------------------------------------------|---------------------------------------------------|-------------------------------------|
| Subunit                                                         | FLAG- $\alpha_1\beta_3$ Residue #                 | $\alpha_1\beta_3$ Residue #         |
| $\alpha$                                                        | N138                                              | N103                                |
|                                                                 | T265                                              | T230                                |
|                                                                 | I274                                              | I239                                |
|                                                                 | L275                                              | L240                                |
|                                                                 | V286                                              | V251                                |
|                                                                 | I306                                              | I271                                |
|                                                                 | S307                                              | S272                                |
| $\beta$                                                         | A70                                               | A45                                 |
|                                                                 | V315                                              | V290                                |
|                                                                 | T291                                              | T266                                |
| <b><math>\alpha\beta\gamma</math> GABA<sub>A</sub> receptor</b> |                                                   |                                     |
| Subunit                                                         | FLAG- $\alpha_1\beta_3\gamma_2$ -L3-1D4 Residue # | $\alpha_1\beta_3\gamma_2$ Residue # |
| $\alpha$                                                        | E285                                              | E250                                |
|                                                                 | S311                                              | S276                                |
|                                                                 | P313                                              | P278                                |
| $\beta$                                                         | I247                                              | I222                                |
|                                                                 | Q249                                              | Q224                                |
|                                                                 | Y251                                              | Y226                                |
|                                                                 | I280                                              | I255                                |
|                                                                 | I289                                              | I264                                |
| $\gamma$                                                        | Y280                                              | Y241                                |

Table S2. Azisevoflurane photolabeled residues in FLAG- $\alpha_1\beta_3$  and FLAG- $\alpha_1\beta_3\gamma_{2L}$ -L3-1D4 GABA<sub>A</sub> receptors and corresponding residues within  $\alpha_1\beta_3$  and  $\alpha_1\beta_3\gamma_2$  GABA<sub>A</sub> receptors.

| <b><math>\alpha\beta</math> GABA<sub>A</sub> receptor</b>       |                                                      |                                     |
|-----------------------------------------------------------------|------------------------------------------------------|-------------------------------------|
| Subunit                                                         | FLAG- $\alpha_1\beta_3$ Residue #                    | $\alpha_1\beta_3$ Residue #         |
| $\alpha$                                                        | G139                                                 | G104                                |
|                                                                 | C269                                                 | C234                                |
|                                                                 | P288                                                 | P253                                |
|                                                                 | V292                                                 | V257                                |
| $\beta$                                                         | E204                                                 | E179                                |
|                                                                 | P209                                                 | P184                                |
|                                                                 | W266                                                 | W241                                |
|                                                                 | A274                                                 | T255                                |
|                                                                 | T280                                                 | A249                                |
|                                                                 | L442                                                 | L417                                |
| <b><math>\alpha\beta\gamma</math> GABA<sub>A</sub> receptor</b> |                                                      |                                     |
| Subunit                                                         | FLAG- $\alpha_1\beta_3\gamma_{2L}$ -L3-1D4 Residue # | $\alpha_1\beta_3\gamma_2$ Residue # |
| $\alpha$                                                        | S276                                                 | S241                                |
|                                                                 | R290                                                 | R255                                |
|                                                                 | V295                                                 | V260                                |
|                                                                 | T296                                                 | T261                                |
|                                                                 | T300                                                 | T265                                |
| $\beta$                                                         | A273                                                 | A248                                |
| $\gamma$                                                        | L307                                                 | L268                                |
|                                                                 | G308                                                 | G269                                |

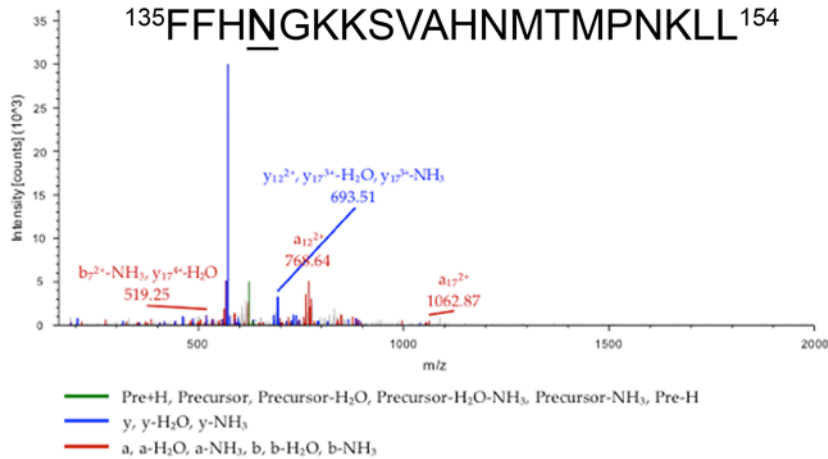

| #1 | a <sup>+</sup> | a <sup>2+</sup> | a <sup>3+</sup> | a <sup>4+</sup> | b <sup>+</sup> | b <sup>2+</sup> | b <sup>3+</sup> | b <sup>4+</sup> | Seq.        | y <sup>+</sup> | y <sup>2+</sup> | y <sup>3+</sup> | y <sup>4+</sup> | #2 |
|----|----------------|-----------------|-----------------|-----------------|----------------|-----------------|-----------------|-----------------|-------------|----------------|-----------------|-----------------|-----------------|----|
| 1  | 120.08         | 60.54           | 40.70           | 30.78           | 148.08         | 74.54           | 50.03           | 37.77           | F           |                |                 |                 |                 | 20 |
| 2  | 267.15         | 134.08          | 89.72           | 67.54           | 295.14         | 148.08          | 99.05           | 74.54           | F           | 2379.09        | 1190.05         | <b>793.70</b>   | 595.53          | 19 |
| 3  | 404.21         | 202.61          | 135.41          | 101.81          | 432.20         | <b>216.61</b>   | 144.74          | 108.81          | H           | 2232.02        | 1116.52         | <b>744.68</b>   | <b>558.76</b>   | 18 |
| 4  | <b>714.22</b>  | 357.61          | 238.75          | 179.31          | <b>742.22</b>  | <b>371.61</b>   | 248.08          | 186.31          | N-Azilso    | 2094.97        | 1047.99         | <b>698.99</b>   | 524.50          | 17 |
| 5  | <b>771.24</b>  | 386.13          | 257.75          | 193.57          | 799.24         | 400.12          | 267.08          | 200.57          | G           | 1784.95        | <b>892.98</b>   | <b>595.66</b>   | 446.99          | 16 |
| 6  | 899.34         | 450.17          | 300.45          | 225.59          | 927.33         | 464.17          | 309.78          | 232.59          | K           | 1727.93        | <b>864.47</b>   | <b>576.65</b>   | 432.74          | 15 |
| 7  | 1027.43        | 514.22          | 343.15          | 257.61          | <b>1055.43</b> | 528.22          | 352.48          | 264.61          | K           | 1599.83        | 800.42          | <b>533.95</b>   | 400.71          | 14 |
| 8  | 1114.47        | <b>557.74</b>   | <b>372.16</b>   | 279.37          | 1142.46        | <b>571.73</b>   | 381.49          | 286.37          | S           | 1471.74        | 736.37          | 491.25          | 368.69          | 13 |
| 9  | 1213.53        | 607.27          | <b>405.18</b>   | 304.14          | 1241.53        | <b>621.27</b>   | 414.51          | 311.14          | V           | 1384.71        | <b>692.86</b>   | <b>462.24</b>   | 346.93          | 12 |
| 10 | 1284.57        | 642.79          | 428.86          | 321.90          | 1312.57        | <b>656.79</b>   | 438.19          | 328.90          | A           | 1285.64        | 643.32          | 429.22          | 322.17          | 11 |
| 11 | 1421.63        | 711.32          | 474.55          | <b>356.16</b>   | 1449.63        | <b>725.32</b>   | <b>483.88</b>   | 363.16          | H           | 1214.60        | 607.80          | <b>405.54</b>   | 304.41          | 10 |
| 12 | 1535.67        | <b>768.34</b>   | 512.56          | <b>384.67</b>   | 1563.67        | <b>782.34</b>   | 521.89          | 391.67          | N           | 1077.54        | 539.28          | 359.85          | 270.14          | 9  |
| 13 | 1666.71        | 833.86          | 556.24          | <b>417.43</b>   | 1694.71        | <b>847.86</b>   | <b>565.57</b>   | 424.43          | M           | 963.50         | 482.25          | 321.84          | 241.63          | 8  |
| 14 | 1767.76        | <b>884.38</b>   | 589.93          | <b>442.70</b>   | 1795.76        | <b>898.38</b>   | <b>599.26</b>   | 449.69          | T           | 832.46         | <b>416.73</b>   | 278.16          | 208.87          | 7  |
| 15 | 1914.80        | 957.90          | 638.94          | <b>479.45</b>   | 1942.79        | 971.90          | <b>648.27</b>   | <b>486.45</b>   | M-Oxidation | <b>731.41</b>  | 366.21          | 244.48          | 183.61          | 6  |
| 16 | 2011.85        | 1006.43         | 671.29          | <b>503.72</b>   | 2039.84        | 1020.43         | 680.62          | 510.72          | P           | 584.38         | 292.69          | 195.46          | 146.85          | 5  |
| 17 | 2125.89        | <b>1063.45</b>  | 709.30          | <b>532.23</b>   | 2153.89        | 1077.45         | <b>718.63</b>   | 539.23          | N           | <b>487.32</b>  | 244.17          | 163.11          | 122.59          | 4  |
| 18 | 2253.99        | 1127.50         | 752.00          | <b>564.25</b>   | 2281.98        | 1141.49         | <b>761.33</b>   | <b>571.25</b>   | K           | 373.28         | 187.14          | 125.10          | 94.08           | 3  |
| 19 | 2367.07        | 1184.04         | <b>789.70</b>   | <b>592.52</b>   | 2395.07        | 1198.04         | 799.03          | <b>599.52</b>   | L           | 245.19         | 123.10          | 82.40           | 62.05           | 2  |
| 20 |                |                 |                 |                 |                |                 |                 |                 | L           | 132.10         | 66.55           | 44.71           | 33.78           | 1  |

Fig S1. Identification of aziisoflurane adduct within the FLAG- $\alpha_1$  subunit of FLAG- $\alpha_1\beta_3$  GABA<sub>A</sub> receptor photolabeled in the presence of 30  $\mu$ M aziisoflurane. Mass spectrum and corresponding peptide fragment table of peptides containing aziisoflurane  $\alpha$ 1-N138 adduct. Residue modified by photolabel derivative is in bold and underlined. Detected identified ions are colored and labeled accordingly. Residues detected with a modification are noted.



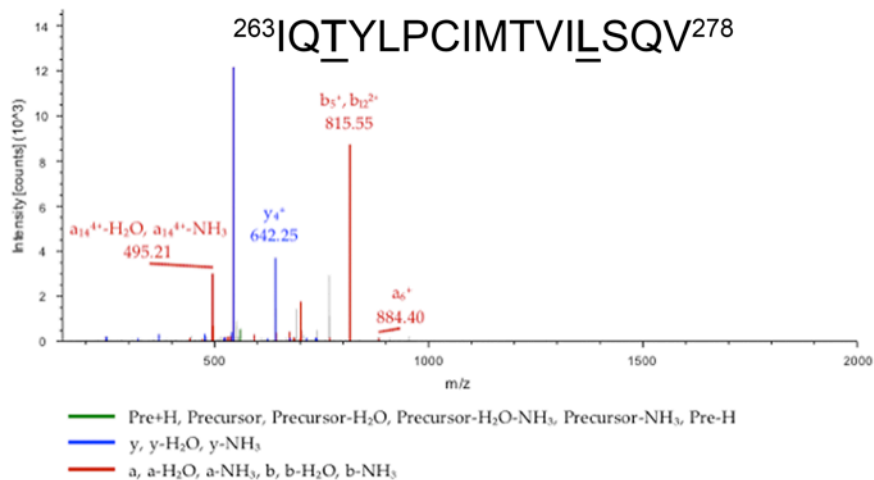

| #1 | a <sup>+</sup> | a <sup>2+</sup> | a <sup>3+</sup> | a <sup>4+</sup> | b <sup>+</sup> | b <sup>2+</sup> | b <sup>3+</sup> | b <sup>4+</sup> | Seq.              | y <sup>+</sup> | y <sup>2+</sup> | y <sup>3+</sup> | y <sup>4+</sup> | #2 |
|----|----------------|-----------------|-----------------|-----------------|----------------|-----------------|-----------------|-----------------|-------------------|----------------|-----------------|-----------------|-----------------|----|
| 1  | 86.10          | 43.55           | 29.37           | 22.28           | 114.09         | 57.55           | 38.70           | 29.28           | I                 |                |                 |                 |                 | 16 |
| 2  | 214.16         | 107.58          | 72.06           | 54.29           | 242.15         | 121.58          | 81.39           | 61.29           | Q                 | 2157.87        | 1079.44         | 719.96          | <u>540.22</u>   | 15 |
| 3  | 511.17         | 256.09          | 171.06          | 128.55          | 539.17         | 270.09          | 180.39          | 135.55          | T-Azilso          | 2029.81        | 1015.41         | <u>677.27</u>   | 508.21          | 14 |
| 4  | 674.24         | 337.62          | 225.42          | 169.31          | <u>702.23</u>  | 351.62          | 234.75          | 176.31          | Y                 | 1732.79        | 866.90          | 578.27          | 433.95          | 13 |
| 5  | 787.32         | 394.16          | 263.11          | 197.59          | <u>815.32</u>  | 408.16          | 272.44          | 204.58          | L                 | 1569.72        | 785.37          | <u>523.91</u>   | 393.19          | 12 |
| 6  | <u>884.37</u>  | <u>442.69</u>   | 295.46          | 221.85          | 912.37         | 456.69          | 304.79          | 228.85          | P                 | 1456.64        | 728.82          | 486.22          | 364.92          | 11 |
| 7  | 1044.40        | <u>522.71</u>   | 348.81          | 261.86          | 1072.40        | <u>536.70</u>   | 358.14          | 268.86          | C-Carbamidomethyl | 1359.59        | 680.30          | 453.87          | 340.65          | 10 |
| 8  | 1157.49        | 579.25          | 386.50          | 290.13          | 1185.48        | <u>593.25</u>   | 395.83          | 297.13          | I                 | 1199.56        | 600.28          | 400.52          | 300.64          | 9  |
| 9  | 1288.53        | <u>644.77</u>   | 430.18          | 322.89          | 1316.52        | 658.77          | 439.51          | 329.89          | M                 | 1086.47        | <u>543.74</u>   | 362.83          | 272.37          | 8  |
| 10 | 1389.58        | 695.29          | 463.86          | 348.15          | 1417.57        | 709.29          | <u>473.20</u>   | 355.15          | T                 | 955.43         | <u>478.22</u>   | 319.15          | 239.61          | 7  |
| 11 | 1488.65        | 744.83          | <u>496.89</u>   | 372.92          | 1516.64        | 758.82          | 506.22          | 379.92          | V                 | 854.38         | 427.70          | 285.47          | 214.35          | 6  |
| 12 | 1601.73        | 801.37          | 534.58          | 401.19          | 1629.72        | <u>815.37</u>   | <u>543.91</u>   | 408.19          | I                 | 755.32         | 378.16          | 252.44          | 189.58          | 5  |
| 13 | 1910.79        | 955.90          | 637.60          | <u>478.45</u>   | 1938.78        | 969.89          | 646.93          | 485.45          | L-Azilso          | <u>642.23</u>  | <u>321.62</u>   | 214.75          | 161.31          | 4  |
| 14 | 1997.82        | 999.41          | 666.61          | 500.21          | 2025.81        | 1013.41         | <u>675.94</u>   | 507.21          | S                 | 333.18         | 167.09          | 111.73          | 84.05           | 3  |
| 15 | 2125.88        | 1063.44         | 709.30          | <u>532.22</u>   | 2153.87        | 1077.44         | 718.63          | 539.22          | Q                 | 246.14         | 123.58          | 82.72           | 62.29           | 2  |
| 16 |                |                 |                 |                 |                |                 |                 |                 | V                 | 118.09         | 59.55           | 40.03           | 30.28           | 1  |

Fig S2. Identification of aziisoflurane adduct within the FLAG- $\alpha_1$  subunit of FLAG- $\alpha_1\beta_3$  GABA<sub>A</sub> receptors photolabeled in the presence of 30  $\mu\text{M}$  aziisoflurane. Mass spectrum and corresponding peptide fragment table of peptides containing aziisoflurane  $\alpha_1$ -T265/ $\alpha_1$ -L275 adduct. Residue modified by photolabel derivative is in bold and underlined. Detected identified ions are colored and labeled accordingly. Residues detected with a modification are noted.

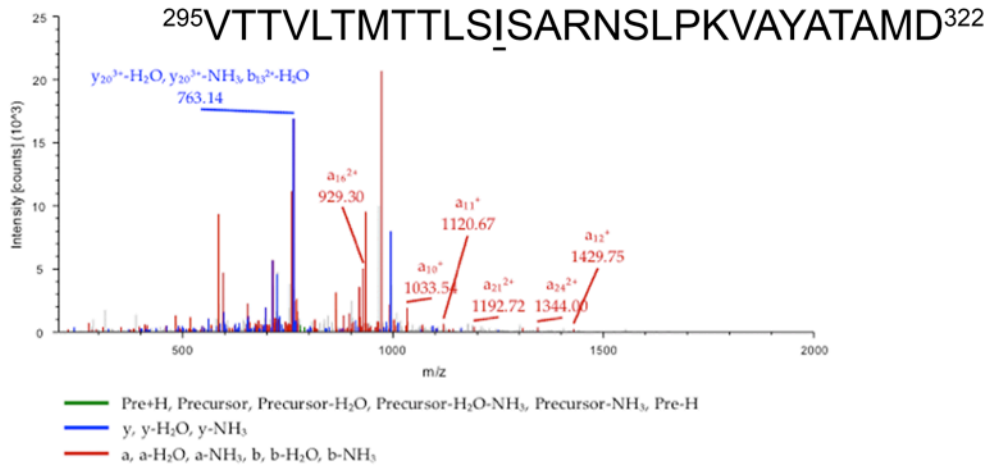

| #1 | a*                    | a <sup>2+</sup>       | a <sup>3+</sup>      | a <sup>4+</sup>      | b*                   | b <sup>2+</sup>      | b <sup>3+</sup>       | b <sup>4+</sup>      | Seq.         | y*                    | y <sup>2+</sup>       | y <sup>3+</sup>      | y <sup>4+</sup>      | #2 |
|----|-----------------------|-----------------------|----------------------|----------------------|----------------------|----------------------|-----------------------|----------------------|--------------|-----------------------|-----------------------|----------------------|----------------------|----|
| 1  | 72.08                 | 36.54                 | 24.70                | 18.78                | 100.08               | 50.54                | 34.03                 | 25.77                | V            |                       |                       |                      |                      | 28 |
| 2  | 173.13                | 87.07                 | 58.38                | 44.04                | 201.12               | 101.07               | 67.71                 | 51.04                | T            | 3053.44               | 1527.22               | 1018.48              | <b><u>764.12</u></b> | 27 |
| 3  | 274.18                | 137.59                | 92.06                | 69.30                | 302.17               | 151.59               | 101.40                | 76.30                | T            | 2952.39               | 1476.70               | <b><u>984.80</u></b> | <b><u>738.85</u></b> | 26 |
| 4  | 373.24                | 187.13                | 125.09               | 94.07                | <b><u>401.24</u></b> | 201.12               | 134.42                | 101.07               | V            | 2851.34               | 1426.18               | 951.12               | <b><u>713.59</u></b> | 25 |
| 5  | 486.33                | 243.67                | 162.78               | 122.34               | 514.32               | 257.67               | 172.11                | 129.34               | L            | 2752.28               | 1376.64               | <b><u>918.10</u></b> | 688.82               | 24 |
| 6  | <b><u>587.38</u></b>  | <b><u>294.19</u></b>  | 196.46               | 147.60               | 615.37               | 308.19               | 205.80                | 154.60               | T            | 2639.19               | 1320.10               | <b><u>880.40</u></b> | <b><u>660.55</u></b> | 23 |
| 7  | <b><u>718.42</u></b>  | 359.71                | 240.14               | 180.36               | 746.41               | 373.71               | 249.48                | 187.36               | M            | 2538.14               | 1269.58               | 846.72               | 635.29               | 22 |
| 8  | <b><u>819.46</u></b>  | <b><u>410.24</u></b>  | 273.83               | 205.62               | 847.46               | 424.23               | 283.16                | 212.62               | T            | 2407.10               | 1204.06               | <b><u>803.04</u></b> | <b><u>602.53</u></b> | 21 |
| 9  | <b><u>920.51</u></b>  | <b><u>460.76</u></b>  | 307.51               | 230.88               | 948.51               | 474.76               | 316.84                | 237.88               | T            | 2306.06               | 1153.53               | <b><u>769.36</u></b> | 577.27               | 20 |
| 10 | <b><u>1033.60</u></b> | <b><u>517.30</u></b>  | 345.20               | 259.15               | 1061.59              | <b><u>531.30</u></b> | 354.54                | 266.15               | L            | 2205.01               | <b><u>1103.01</u></b> | <b><u>735.67</u></b> | <b><u>552.01</u></b> | 19 |
| 11 | <b><u>1120.63</u></b> | <b><u>560.82</u></b>  | 374.21               | 280.91               | 1148.62              | 574.82               | <b><u>383.55</u></b>  | 287.91               | S            | 2091.92               | 1046.47               | <b><u>697.98</u></b> | 523.74               | 18 |
| 12 | <b><u>1429.68</u></b> | 715.35                | 477.23               | 358.18               | 1457.68              | 729.34               | 486.56                | 365.18               | I-Azifluoro  | 2004.89               | 1002.95               | <b><u>668.97</u></b> | <b><u>501.98</u></b> | 17 |
| 13 | 1516.72               | <b><u>758.86</u></b>  | 506.24               | 379.93               | 1544.71              | <b><u>772.86</u></b> | <b><u>515.58</u></b>  | 386.93               | S            | 1695.84               | <b><u>848.42</u></b>  | <b><u>565.95</u></b> | 424.71               | 16 |
| 14 | 1587.75               | 794.38                | <b><u>529.92</u></b> | <b><u>397.69</u></b> | 1615.75              | 808.38               | 539.25                | 404.69               | A            | 1608.81               | <b><u>804.91</u></b>  | 536.94               | <b><u>402.96</u></b> | 15 |
| 15 | 1743.85               | 872.43                | 581.96               | 436.72               | 1771.85              | <b><u>886.43</u></b> | 591.29                | 443.72               | R            | 1537.77               | <b><u>769.39</u></b>  | 513.26               | 385.20               | 14 |
| 16 | 1858.88               | <b><u>929.94</u></b>  | 620.30               | 465.48               | 1886.88              | <b><u>943.94</u></b> | <b><u>629.63</u></b>  | 472.47               | N-Deamidated | 1381.67               | <b><u>691.34</u></b>  | <b><u>461.23</u></b> | 346.17               | 13 |
| 17 | 1945.91               | <b><u>973.46</u></b>  | <b><u>649.31</u></b> | 487.23               | 1973.91              | 987.46               | <b><u>658.64</u></b>  | <b><u>494.23</u></b> | S            | 1266.64               | <b><u>633.82</u></b>  | 422.88               | 317.42               | 12 |
| 18 | 2059.00               | <b><u>1030.00</u></b> | <b><u>687.00</u></b> | <b><u>515.50</u></b> | 2086.99              | 1044.00              | <b><u>696.34</u></b>  | <b><u>522.50</u></b> | L            | 1179.61               | <b><u>590.31</u></b>  | 393.87               | 295.66               | 11 |
| 19 | 2156.05               | 1078.53               | <b><u>719.35</u></b> | 539.77               | 2184.04              | 1092.53              | <b><u>728.69</u></b>  | <b><u>546.77</u></b> | P            | <b><u>1066.52</u></b> | 533.77                | 356.18               | 267.39               | 10 |
| 20 | 2284.14               | <b><u>1142.58</u></b> | <b><u>762.05</u></b> | 571.79               | 2312.14              | 1156.57              | <b><u>771.38</u></b>  | 578.79               | K            | <b><u>969.47</u></b>  | <b><u>485.24</u></b>  | <b><u>323.83</u></b> | 243.12               | 9  |
| 21 | 2383.21               | <b><u>1192.11</u></b> | 795.08               | <b><u>596.56</u></b> | 2411.21              | 1206.11              | <b><u>804.41</u></b>  | <b><u>603.56</u></b> | V            | <b><u>841.38</u></b>  | <b><u>421.19</u></b>  | 281.13               | 211.10               | 8  |
| 22 | 2454.25               | 1227.63               | <b><u>818.75</u></b> | 614.32               | 2482.25              | 1241.63              | 828.09                | 621.32               | A            | 742.31                | <b><u>371.66</u></b>  | 248.11               | 186.33               | 7  |
| 23 | 2617.31               | <b><u>1309.16</u></b> | <b><u>873.11</u></b> | <b><u>655.08</u></b> | 2645.31              | 1323.16              | <b><u>882.44</u></b>  | 662.08               | Y            | <b><u>671.27</u></b>  | 336.14                | 224.43               | 168.57               | 6  |
| 24 | 2688.35               | <b><u>1344.68</u></b> | <b><u>896.79</u></b> | <b><u>672.84</u></b> | 2716.35              | 1358.68              | <b><u>906.12</u></b>  | <b><u>679.84</u></b> | A            | <b><u>508.21</u></b>  | 254.61                | 170.07               | 127.81               | 5  |
| 25 | 2789.40               | 1395.20               | 930.47               | <b><u>698.11</u></b> | 2817.39              | 1409.20              | <b><u>939.80</u></b>  | <b><u>705.10</u></b> | T            | <b><u>437.17</u></b>  | 219.09                | 146.39               | 110.05               | 4  |
| 26 | 2860.44               | 1430.72               | 954.15               | <b><u>715.86</u></b> | 2888.43              | 1444.72              | <b><u>963.48</u></b>  | <b><u>722.86</u></b> | A            | 336.12                | 168.56                | 112.71               | 84.79                | 3  |
| 27 | 2991.48               | 1496.24               | 997.83               | <b><u>748.62</u></b> | 3019.47              | 1510.24              | <b><u>1007.16</u></b> | 755.62               | M            | 265.09                | 133.05                | 89.03                | 67.03                | 2  |
| 28 |                       |                       |                      |                      |                      |                      |                       |                      | D            | 134.04                | 67.53                 | 45.35                | 34.27                | 1  |

Fig S3.. Identification of aziisoflurane adduct within the FLAG- $\alpha_1$  subunit of FLAG- $\alpha_1\beta_3$  GABA<sub>A</sub> receptors photolabeled in the presence of 30  $\mu$ M aziisoflurane. Mass spectrum and corresponding peptide fragment table of peptides containing aziisoflurane  $\alpha_1$ -I306 adduct. Residue modified by photolabel derivative is in bold and underlined. Detected identified ions are colored and labeled accordingly. Residues detected with a modification are noted.

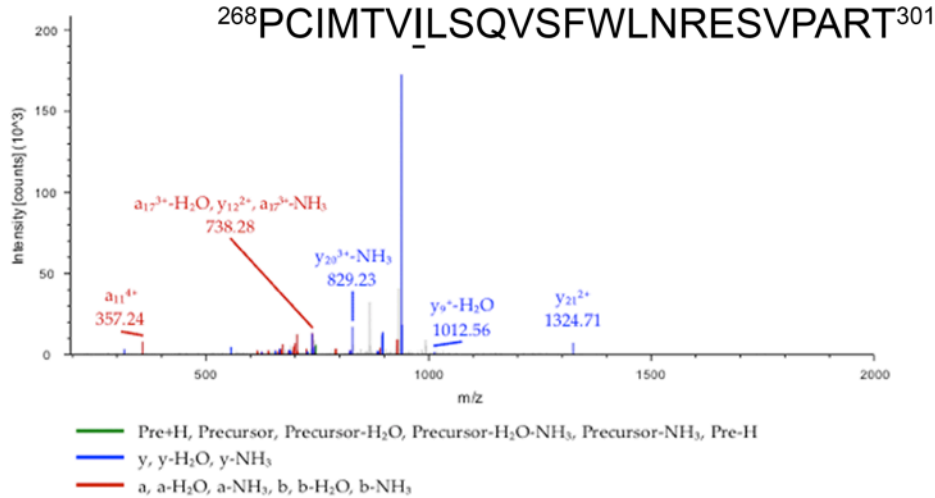

| #1 | a <sup>+</sup> | a <sup>2+</sup> | a <sup>3+</sup> | a <sup>4+</sup> | b <sup>+</sup> | b <sup>2+</sup> | b <sup>3+</sup> | b <sup>4+</sup>  | Seq.              | y <sup>+</sup> | y <sup>2+</sup> | y <sup>3+</sup> | y <sup>4+</sup> | #2 |
|----|----------------|-----------------|-----------------|-----------------|----------------|-----------------|-----------------|------------------|-------------------|----------------|-----------------|-----------------|-----------------|----|
| 1  | 70.07          | 35.54           | 24.03           | 18.27           | 98.06          | 49.53           | 33.36           | 25.27047         | P                 |                |                 |                 |                 | 24 |
| 2  | 230.10         | 115.55          | 77.37           | 58.28           | 258.09         | 129.55          | 86.70           | 65.27813         | C-Carbamidomethyl | 2921.34        | 1461.17         | 974.45          | 731.09          | 23 |
| 3  | 343.18         | 172.09          | 115.06          | 86.55           | 371.17         | 186.09          | 124.40          | 93.54915         | I                 | 2761.31        | 1381.16         | 921.11          | <b>691.08</b>   | 22 |
| 4  | 490.22         | 245.61          | 164.08          | 123.31          | 518.21         | 259.61          | 173.41          | 130.308          | M-Oxidation       | 2648.23        | <b>1324.62</b>  | <b>883.41</b>   | 662.81          | 21 |
| 5  | 591.26         | 296.14          | 197.76          | 148.57          | 619.26         | 310.13          | 207.09          | 155.56992        | T                 | 2501.19        | 1251.10         | 834.40          | <b>626.05</b>   | 20 |
| 6  | 690.33         | 345.67          | 230.78          | 173.34          | 718.33         | 359.67          | 240.11          | 180.33703        | V                 | 2400.14        | 1200.57         | 800.72          | 600.79          | 19 |
| 7  | 999.39         | 500.20          | 333.80          | 250.60          | 1027.38        | 514.19          | 343.13          | 257.6009         | I-Aziso           | 2301.07        | 1151.04         | 767.70          | 576.02          | 18 |
| 8  | 1112.47        | 556.74          | 371.50          | 278.87          | 1140.47        | 570.74          | 380.83          | 285.87192        | L                 | 1992.02        | 996.51          | <b>664.68</b>   | 498.76          | 17 |
| 9  | 1199.50        | 600.26          | 400.51          | 300.63          | 1227.50        | 614.25          | 409.84          | 307.62993        | S                 | 1878.93        | <b>939.97</b>   | 626.98          | 470.49          | 16 |
| 10 | 1328.55        | <b>664.78</b>   | 443.52          | 332.89          | 1356.54        | 678.77          | 452.85          | 339.89058        | Q-Deamidated      | 1791.90        | <b>896.45</b>   | 597.97          | 448.73          | 15 |
| 11 | 1427.61        | 714.31          | 476.54          | <b>357.66</b>   | 1455.61        | 728.31          | 485.87          | 364.65768        | V                 | 1662.86        | 831.93          | <b>554.96</b>   | 416.47          | 14 |
| 12 | 1514.65        | 757.83          | 505.55          | 379.42          | 1542.64        | 771.82          | 514.89          | 386.41569        | S                 | 1563.79        | 782.40          | 521.94          | 391.70          | 13 |
| 13 | 1661.71        | 831.36          | 554.58          | 416.18          | 1689.71        | 845.36          | 563.91          | 423.1828         | F                 | 1476.76        | <b>738.88</b>   | 492.92          | 369.95          | 12 |
| 14 | 1847.79        | 924.40          | 616.60          | 462.70          | 1875.79        | 938.40          | <b>625.93</b>   | 469.70263        | W                 | 1329.69        | <b>665.35</b>   | 443.90          | 333.18          | 11 |
| 15 | 1960.88        | 980.94          | 654.30          | 490.97          | 1988.87        | 994.94          | 663.63          | 497.97364        | L                 | 1143.61        | 572.31          | 381.88          | 286.66          | 10 |
| 16 | 2075.90        | 1038.46         | 692.64          | 519.73          | 2103.90        | 1052.45         | 701.97          | 526.73038        | N-Deamidated      | 1030.53        | 515.77          | 344.18          | 258.39          | 9  |
| 17 | 2232.01        | 1116.51         | <b>744.67</b>   | 558.76          | 2260.00        | 1130.50         | 754.01          | 565.75566        | R                 | 915.50         | 458.25          | 305.84          | 229.63          | 8  |
| 18 | 2361.05        | 1181.03         | 787.69          | 591.02          | 2389.04        | 1195.03         | 797.02          | 598.01631        | E                 | 759.40         | 380.20          | 253.80          | 190.61          | 7  |
| 19 | 2448.08        | 1224.54         | 816.70          | 612.78          | 2476.08        | 1238.54         | 826.03          | 619.77432        | S                 | 630.36         | <b>315.68</b>   | 210.79          | 158.34          | 6  |
| 20 | 2547.15        | 1274.08         | 849.72          | 637.54          | 2575.14        | 1288.08         | 859.05          | 644.54142        | V                 | 543.32         | 272.17          | 181.78          | 136.59          | 5  |
| 21 | 2644.20        | 1322.60         | 882.07          | <b>661.81</b>   | 2672.20        | 1336.60         | <b>891.40</b>   | <b>668.80462</b> | P                 | 444.26         | 222.63          | 148.76          | 111.82          | 4  |
| 22 | 2715.24        | 1358.12         | 905.75          | 679.57          | 2743.23        | 1372.12         | 915.08          | <b>686.5639</b>  | A                 | 347.20         | 174.11          | 116.41          | 87.56           | 3  |
| 23 | 2871.34        | 1436.17         | 957.78          | 718.59          | 2899.33        | 1450.17         | 967.12          | <b>725.58918</b> | R                 | 276.17         | 138.59          | 92.73           | 69.80           | 2  |
| 24 |                |                 |                 |                 |                |                 |                 |                  | T                 | 120.07         | 60.54           | 40.69           | 30.77           | 1  |

Fig S4. Identification of aziisoflurane adduct within the FLAG- $\alpha_1$  subunit of FLAG- $\alpha_1\beta_3$  GABA<sub>A</sub> receptors photolabeled in the presence of 30  $\mu$ M aziisoflurane. Mass spectrum and corresponding peptide fragment table of peptides containing aziisoflurane  $\alpha_1$ -I274 adduct. Residue modified by photolabel derivative is in bold and underlined. Detected identified ions are colored and labeled accordingly. Residues detected with a modification are noted.

<sup>286</sup>VPARTVFGVTTVLTMTTLSISARNSLP<sup>313</sup>

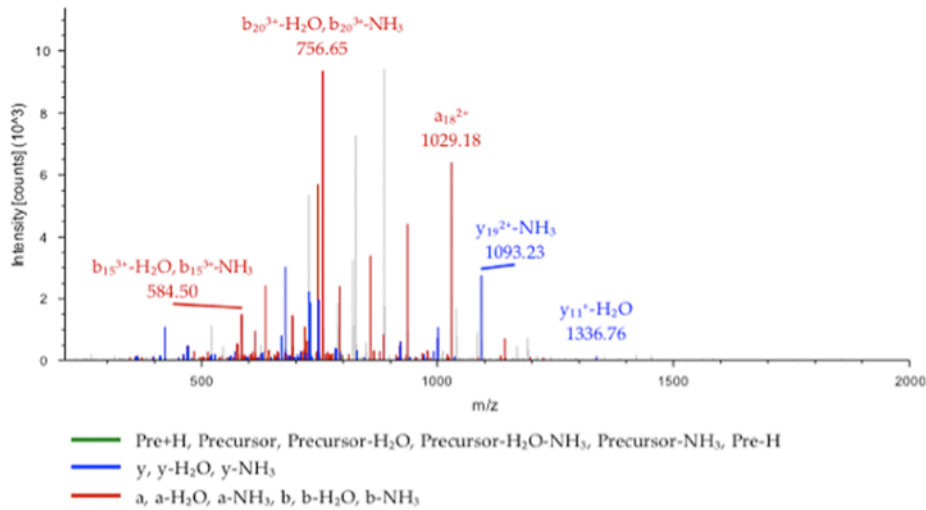

| #1 | a <sup>+</sup> | a <sup>2+</sup> | a <sup>3+</sup> | a <sup>4+</sup> | b <sup>+</sup> | b <sup>2+</sup> | b <sup>3+</sup> | b <sup>4+</sup> | Seq.     | y <sup>+</sup> | y <sup>2+</sup> | y <sup>3+</sup> | y <sup>4+</sup> | #2 |
|----|----------------|-----------------|-----------------|-----------------|----------------|-----------------|-----------------|-----------------|----------|----------------|-----------------|-----------------|-----------------|----|
| 1  | 268.05         | 134.53          | 90.02           | 67.77           | 296.05         | 148.53          | 99.35           | 74.77           | V-Azilso |                |                 |                 |                 | 27 |
| 2  | <u>365.10</u>  | 183.06          | 122.37          | 92.03           | 393.10         | 197.05          | 131.70          | 99.03           | P        | 2929.47        | 1465.24         | <u>977.16</u>   | <u>733.12</u>   | 26 |
| 3  | 436.14         | 218.57          | 146.05          | 109.79          | 464.14         | 232.57          | 155.38          | 116.79          | A        | 2832.42        | 1416.71         | 944.81          | <u>708.86</u>   | 25 |
| 4  | <u>592.24</u>  | 296.63          | 198.09          | 148.82          | 620.24         | 310.62          | 207.42          | 155.81          | R        | 2761.38        | 1381.19         | <u>921.13</u>   | 691.10          | 24 |
| 5  | <u>693.29</u>  | <u>347.15</u>   | 231.77          | 174.08          | <u>721.29</u>  | 361.15          | 241.10          | 181.08          | T        | 2605.28        | 1303.14         | 869.10          | 652.07          | 23 |
| 6  | <u>792.36</u>  | <u>396.68</u>   | 264.79          | 198.85          | 820.35         | <u>410.68</u>   | 274.12          | 205.84          | V        | 2504.23        | 1252.62         | 835.41          | <u>626.81</u>   | 22 |
| 7  | 939.43         | <u>470.22</u>   | 313.81          | 235.61          | <u>967.42</u>  | <u>484.21</u>   | 323.15          | 242.61          | F        | 2405.16        | 1203.08         | 802.39          | 602.05          | 21 |
| 8  | 996.45         | 498.73          | 332.82          | 249.87          | 1024.44        | <u>512.73</u>   | 342.15          | 256.87          | G        | 2258.09        | 1129.55         | 753.37          | 565.28          | 20 |
| 9  | 1095.52        | 548.26          | <u>365.84</u>   | 274.63          | 1123.51        | <u>562.26</u>   | 375.18          | 281.63          | V        | 2201.07        | 1101.04         | <u>734.36</u>   | 551.02          | 19 |
| 10 | <u>1196.57</u> | <u>598.79</u>   | 399.53          | 299.90          | <u>1224.56</u> | <u>612.78</u>   | 408.86          | 306.90          | T        | 2102.00        | 1051.51         | <u>701.34</u>   | 526.26          | 18 |
| 11 | 1297.61        | 649.31          | 433.21          | 325.16          | 1325.61        | <u>663.31</u>   | 442.54          | 332.16          | T        | 2000.96        | <u>1000.98</u>  | 667.66          | 500.99          | 17 |
| 12 | 1396.68        | 698.84          | 466.23          | 349.93          | 1424.68        | <u>712.84</u>   | 475.56          | 356.92          | V        | 1899.91        | 950.46          | 633.97          | 475.73          | 16 |
| 13 | 1509.77        | 755.39          | <u>503.93</u>   | 378.20          | 1537.76        | 769.38          | <u>513.26</u>   | 385.20          | L        | 1800.84        | 900.92          | 600.95          | <u>450.97</u>   | 15 |
| 14 | 1610.81        | 805.91          | 537.61          | 403.46          | 1638.81        | 819.91          | 546.94          | <u>410.46</u>   | T        | 1687.76        | <u>844.38</u>   | 563.26          | <u>422.69</u>   | 14 |
| 15 | 1741.85        | 871.43          | 581.29          | 436.22          | 1769.85        | <u>885.43</u>   | <u>590.62</u>   | 443.22          | M        | 1586.71        | <u>793.86</u>   | <u>529.57</u>   | <u>397.43</u>   | 13 |
| 16 | 1842.90        | <u>921.95</u>   | <u>614.97</u>   | <u>461.48</u>   | 1870.90        | <u>935.95</u>   | <u>624.30</u>   | 468.48          | T        | 1455.67        | <u>728.34</u>   | 485.89          | <u>364.67</u>   | 12 |
| 17 | 1943.95        | 972.48          | 648.65          | 486.74          | 1971.94        | 986.48          | <u>657.99</u>   | 493.74          | T        | 1354.62        | <u>677.81</u>   | 452.21          | 339.41          | 11 |
| 18 | 2057.03        | <u>1029.02</u>  | <u>686.35</u>   | <u>515.01</u>   | 2085.03        | 1043.02         | <u>695.68</u>   | <u>522.01</u>   | L        | 1253.57        | <u>627.29</u>   | 418.53          | 314.15          | 10 |
| 19 | 2144.07        | 1072.54         | 715.36          | <u>536.77</u>   | 2172.06        | <u>1086.53</u>  | 724.69          | 543.77          | S        | 1140.49        | <u>570.75</u>   | 380.83          | 285.88          | 9  |
| 20 | 2257.15        | 1129.08         | 753.05          | 565.04          | 2285.14        | <u>1143.08</u>  | <u>762.39</u>   | 572.04          | I        | 1053.46        | <u>527.23</u>   | 351.82          | 264.12          | 8  |
| 21 | 2540.15        | 1270.58         | 847.39          | <u>635.79</u>   | 2568.15        | 1284.58         | <u>856.72</u>   | <u>642.79</u>   | S-Azilso | 940.37         | <u>470.69</u>   | 314.13          | 235.85          | 7  |
| 22 | 2611.19        | 1306.10         | 871.07          | 653.55          | 2639.18        | 1320.10         | 880.40          | <u>660.55</u>   | A        | 657.37         | 329.19          | 219.79          | 165.10          | 6  |
| 23 | 2767.29        | 1384.15         | <u>923.10</u>   | <u>692.58</u>   | 2795.29        | 1398.15         | <u>932.43</u>   | 699.58          | R        | 586.33         | 293.67          | 196.12          | 147.34          | 5  |
| 24 | 2881.33        | 1441.17         | 961.12          | <u>721.09</u>   | 2909.33        | 1455.17         | <u>970.45</u>   | <u>728.09</u>   | N        | 430.23         | 215.62          | 144.08          | 108.31          | 4  |
| 25 | 2968.37        | 1484.69         | 990.13          | <u>742.85</u>   | 2996.36        | 1498.68         | 999.46          | <u>749.85</u>   | S        | 316.19         | 158.60          | 106.07          | 79.80           | 3  |
| 26 | 3081.45        | 1541.23         | 1027.82         | <u>771.12</u>   | 3109.44        | 1555.23         | 1037.15         | <u>778.12</u>   | L        | 229.15         | 115.08          | 77.06           | 58.04           | 2  |
| 27 |                |                 |                 |                 |                |                 |                 |                 | P        | 116.07         | 58.54           | 39.36           | 29.77           | 1  |

Fig S5. Identification of aziisoflurane adduct within the FLAG- $\alpha_1$  subunit of FLAG- $\alpha_1\beta_3$  GABA<sub>A</sub> receptor photolabeled in the presence of 30  $\mu$ M aziisoflurane. Mass spectrum and corresponding peptide fragment table of peptides containing aziisoflurane  $\alpha_1$ -V286/ $\alpha_1$ -S307 adduct. Residue modified by photolabel derivative is in bold and underlined. Detected identified ions are colored and labeled accordingly. Residues detected with a modification are noted.



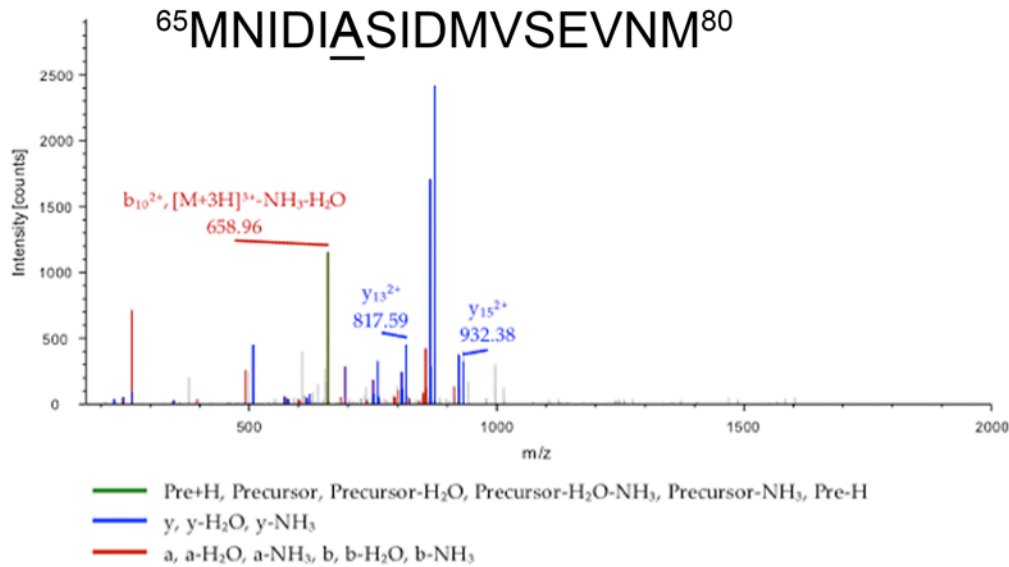

| #1 | a <sup>+</sup>       | a <sup>2+</sup>      | a <sup>3+</sup>      | b <sup>+</sup>       | b <sup>2+</sup>      | b <sup>3+</sup>      | Seq.        | y <sup>+</sup>       | y <sup>2+</sup>      | y <sup>3+</sup>      | #2 |
|----|----------------------|----------------------|----------------------|----------------------|----------------------|----------------------|-------------|----------------------|----------------------|----------------------|----|
| 1  | 120.05               | 60.53                | 40.69                | 148.04               | 74.52                | 50.02                | M-Oxidation |                      |                      |                      | 16 |
| 2  | 234.09               | 117.55               | 78.70                | <b><u>262.09</u></b> | 131.55               | 88.03                | N           | 1862.74              | <b><u>931.87</u></b> | <b><u>621.58</u></b> | 15 |
| 3  | <b><u>347.17</u></b> | 174.09               | 116.40               | 375.17               | 188.09               | 125.73               | I           | 1748.69              | <b><u>874.85</u></b> | 583.57               | 14 |
| 4  | 462.20               | 231.60               | 154.74               | 490.20               | <b><u>245.60</u></b> | 164.07               | D           | 1635.61              | <b><u>818.31</u></b> | 545.88               | 13 |
| 5  | 575.29               | 288.15               | 192.43               | <b><u>603.28</u></b> | 302.14               | 201.77               | I           | 1520.58              | <b><u>760.80</u></b> | <b><u>507.53</u></b> | 12 |
| 6  | 842.29               | 421.65               | 281.44               | 870.29               | 435.65               | 290.77               | A-Azilso    | 1407.50              | 704.25               | 469.84               | 11 |
| 7  | 929.33               | 465.17               | 310.45               | 957.32               | 479.16               | 319.78               | S           | 1140.49              | <b><u>570.75</u></b> | 380.84               | 10 |
| 8  | 1042.41              | 521.71               | 348.14               | 1070.41              | 535.71               | 357.47               | I           | 1053.46              | 527.23               | 351.82               | 9  |
| 9  | 1157.44              | 579.22               | 386.48               | 1185.43              | 593.22               | <b><u>395.82</u></b> | D           | 940.38               | 470.69               | 314.13               | 8  |
| 10 | 1288.48              | 644.74               | 430.16               | 1316.47              | <b><u>658.74</u></b> | 439.50               | M           | 825.35               | 413.18               | 275.79               | 7  |
| 11 | 1387.55              | <b><u>694.28</u></b> | 463.19               | 1415.54              | 708.27               | 472.52               | V           | <b><u>694.31</u></b> | <b><u>347.66</u></b> | 232.11               | 6  |
| 12 | 1474.58              | <b><u>737.79</u></b> | <b><u>492.20</u></b> | 1502.57              | <b><u>751.79</u></b> | 501.53               | S           | 595.24               | 298.12               | 199.08               | 5  |
| 13 | 1603.62              | <b><u>802.31</u></b> | 535.21               | 1631.62              | 816.31               | 544.54               | E           | <b><u>508.21</u></b> | 254.61               | 170.07               | 4  |
| 14 | 1702.69              | <b><u>851.85</u></b> | 568.23               | 1730.68              | <b><u>865.85</u></b> | <b><u>577.57</u></b> | V           | 379.16               | 190.09               | 127.06               | 3  |
| 15 | 1816.73              | 908.87               | 606.25               | 1844.73              | <b><u>922.87</u></b> | <b><u>615.58</u></b> | N           | 280.10               | 140.55               | 94.04                | 2  |
| 16 |                      |                      |                      |                      |                      |                      | M-Oxidation | 166.05               | 83.53                | 56.02                | 1  |

Fig S6. Identification of aziisoflurane adduct within the  $\beta_3$  subunit of FLAG- $\alpha_1\beta_3$  GABA<sub>A</sub> receptors photolabeled in the presence of 30  $\mu\text{M}$  aziisoflurane. Mass spectrum and corresponding peptide fragment table of peptides containing aziisoflurane  $\beta_3$ -A70 adduct. Residue modified by photolabel derivative is in bold and underlined. Detected identified ions are colored and labeled accordingly. Residues detected with a modification are noted.

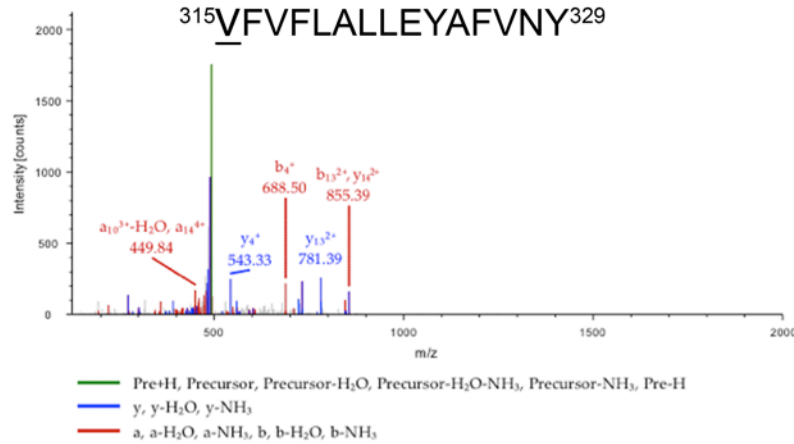

| #1 | a <sup>+</sup> | a <sup>2+</sup> | a <sup>3+</sup> | a <sup>4+</sup> | b <sup>+</sup> | b <sup>2+</sup> | b <sup>3+</sup> | b <sup>4+</sup> | Seq.         | y <sup>+</sup> | y <sup>2+</sup> | y <sup>3+</sup> | y <sup>4+</sup> | #2 |
|----|----------------|-----------------|-----------------|-----------------|----------------|-----------------|-----------------|-----------------|--------------|----------------|-----------------|-----------------|-----------------|----|
| 1  | 268.05         | 134.53          | 90.02           | 67.77           | 296.05         | 148.53          | 99.35           | 74.77           | V-Azilso     |                |                 |                 |                 | 15 |
| 2  | <b>415.12</b>  | 208.06          | 139.05          | 104.54          | <b>443.12</b>  | 222.06          | 148.38          | 111.53          | F            | 1709.88        | <b>855.44</b>   | 570.63          | <b>428.23</b>   | 14 |
| 3  | 514.19         | 257.60          | 172.07          | 129.30          | 542.18         | <b>271.60</b>   | 181.40          | 136.30          | V            | 1562.81        | <b>781.91</b>   | <b>521.61</b>   | <b>391.46</b>   | 13 |
| 4  | 661.26         | 331.13          | <b>221.09</b>   | 166.07          | <b>689.25</b>  | 345.13          | 230.42          | 173.07          | F            | 1463.75        | <b>732.38</b>   | <b>488.59</b>   | 366.69          | 12 |
| 5  | 774.34         | 387.67          | 258.79          | <b>194.34</b>   | 802.34         | <b>401.67</b>   | 268.12          | 201.34          | L            | 1316.68        | 658.84          | <b>439.56</b>   | 329.92          | 11 |
| 6  | <b>845.38</b>  | 423.19          | 282.46          | 212.10          | 873.37         | 437.19          | 291.80          | 219.10          | A            | 1203.59        | <b>602.30</b>   | 401.87          | <b>301.65</b>   | 10 |
| 7  | 958.46         | <b>479.74</b>   | 320.16          | 240.37          | 986.46         | <b>493.73</b>   | 329.49          | 247.37          | L            | 1132.56        | <b>566.78</b>   | 378.19          | <b>283.89</b>   | 9  |
| 8  | 1071.55        | <b>536.28</b>   | 357.85          | 268.64          | 1099.54        | <b>550.27</b>   | 367.19          | <b>275.64</b>   | L            | 1019.47        | 510.24          | 340.50          | 255.62          | 8  |
| 9  | 1200.59        | <b>600.80</b>   | <b>400.87</b>   | <b>300.90</b>   | 1228.58        | 614.80          | <b>410.20</b>   | 307.90          | E            | 906.39         | <b>453.70</b>   | <b>302.80</b>   | 227.35          | 7  |
| 10 | 1363.65        | 682.33          | <b>455.22</b>   | <b>341.67</b>   | 1391.65        | 696.33          | <b>464.55</b>   | 348.67          | Y            | 777.35         | 389.18          | 259.79          | 195.09          | 6  |
| 11 | 1434.69        | 717.85          | <b>478.90</b>   | <b>359.43</b>   | 1462.68        | <b>731.85</b>   | <b>488.23</b>   | 366.43          | A            | 614.28         | 307.64          | 205.43          | 154.33          | 5  |
| 12 | 1581.76        | 791.38          | 527.92          | 396.20          | 1609.75        | 805.38          | <b>537.26</b>   | 403.19          | F            | <b>543.24</b>  | <b>272.13</b>   | 181.75          | 136.57          | 4  |
| 13 | 1680.83        | 840.92          | <b>560.95</b>   | 420.96          | 1708.82        | <b>854.91</b>   | 570.28          | <b>427.96</b>   | V            | 396.18         | 198.59          | 132.73          | 99.80           | 3  |
| 14 | 1795.85        | 898.43          | 599.29          | <b>449.72</b>   | 1823.85        | 912.43          | <b>608.62</b>   | <b>456.72</b>   | N-Deamidated | 297.11         | 149.06          | 99.71           | 75.03           | 2  |
| 15 |                |                 |                 |                 |                |                 |                 |                 | Y            | 182.08         | 91.54           | 61.37           | 46.28           | 1  |

Fig S8. Identification of aziisoflurane adduct within the  $\beta_3$  subunit of FLAG- $\alpha_1\beta_3$  GABA<sub>A</sub> receptors photolabeled in the presence of 30  $\mu$ M aziisoflurane. Mass spectrum and corresponding peptide fragment table of peptides containing aziisoflurane  $\beta_3$ -V315 adduct. Residue modified by photolabel derivative is in bold and underlined. Detected identified ions are colored and labeled accordingly. Residues detected with a modification are noted.

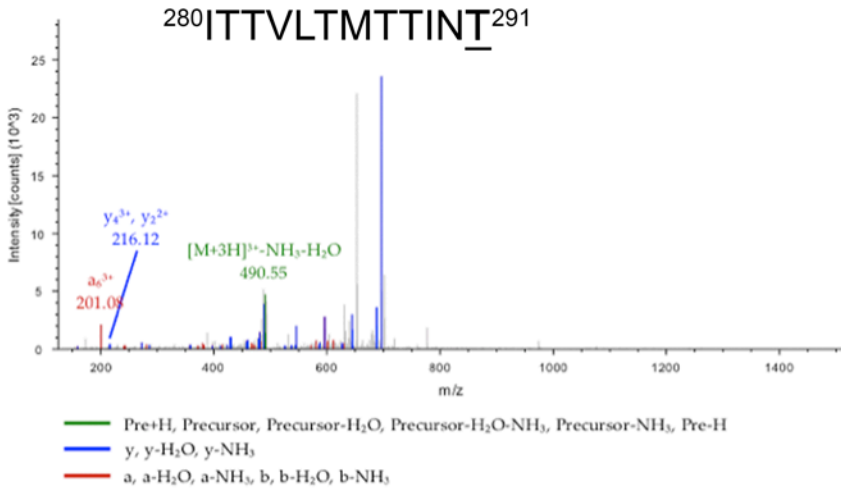

| #1 | a <sup>+</sup> | a <sup>2+</sup> | a <sup>3+</sup> | b <sup>+</sup> | b <sup>2+</sup> | b <sup>3+</sup> | Seq.     | y <sup>+</sup> | y <sup>2+</sup> | y <sup>3+</sup> | #2 |
|----|----------------|-----------------|-----------------|----------------|-----------------|-----------------|----------|----------------|-----------------|-----------------|----|
| 1  | 86.10          | 43.55           | 29.37           | 114.09         | 57.55           | 38.70           | I        |                |                 |                 | 12 |
| 2  | 187.14         | 94.08           | 63.05           | 215.14         | 108.07          | 72.38           | T        | 1391.60        | <b>696.30</b>   | 464.54          | 11 |
| 3  | 288.19         | 144.60          | 96.74           | 316.19         | <b>158.60</b>   | 106.07          | T        | 1290.55        | <b>645.78</b>   | <b>430.85</b>   | 10 |
| 4  | 387.26         | 194.13          | 129.76          | <b>415.26</b>  | 208.13          | 139.09          | V        | 1189.50        | <b>595.25</b>   | <b>397.17</b>   | 9  |
| 5  | 500.34         | 250.68          | 167.45          | 528.34         | 264.67          | 176.78          | L        | 1090.43        | <b>545.72</b>   | 364.15          | 8  |
| 6  | <b>601.39</b>  | 301.20          | <b>201.14</b>   | <b>629.39</b>  | 315.20          | 210.47          | T        | 977.35         | <b>489.18</b>   | 326.45          | 7  |
| 7  | 732.43         | 366.72          | <b>244.82</b>   | 760.43         | <b>380.72</b>   | 254.15          | M        | 876.30         | 438.65          | 292.77          | 6  |
| 8  | 833.48         | 417.24          | 278.50          | 861.48         | <b>431.24</b>   | 287.83          | T        | 745.26         | 373.13          | 249.09          | 5  |
| 9  | 934.53         | <b>467.77</b>   | 312.18          | 962.52         | <b>481.77</b>   | 321.51          | T        | <b>644.21</b>  | 322.61          | <b>215.41</b>   | 4  |
| 10 | 1047.61        | 524.31          | 349.88          | 1075.61        | 538.31          | 359.21          | I        | <b>543.16</b>  | <b>272.09</b>   | 181.73          | 3  |
| 11 | 1161.65        | <b>581.33</b>   | 387.89          | 1189.65        | <b>595.33</b>   | <b>397.22</b>   | N        | <b>430.08</b>  | <b>215.54</b>   | 144.03          | 2  |
| 12 |                |                 |                 |                |                 |                 | T-AziIso | 316.04         | <b>158.52</b>   | 106.02          | 1  |

Fig S8. Identification of aziisoflurane adduct within the  $\beta_3$  subunit of FLAG- $\alpha_1\beta_3$  GABA<sub>A</sub> receptors photolabeled in the presence of 30  $\mu$ M aziisoflurane. Mass spectrum and corresponding peptide fragment table of peptides containing aziisoflurane  $\beta_3$ -291 adduct. Residue modified by photolabel derivative is in bold and underlined. Detected identified ions are colored and labeled accordingly. Residues detected with a modification are noted.

282LNRESVPA<sup>289</sup>

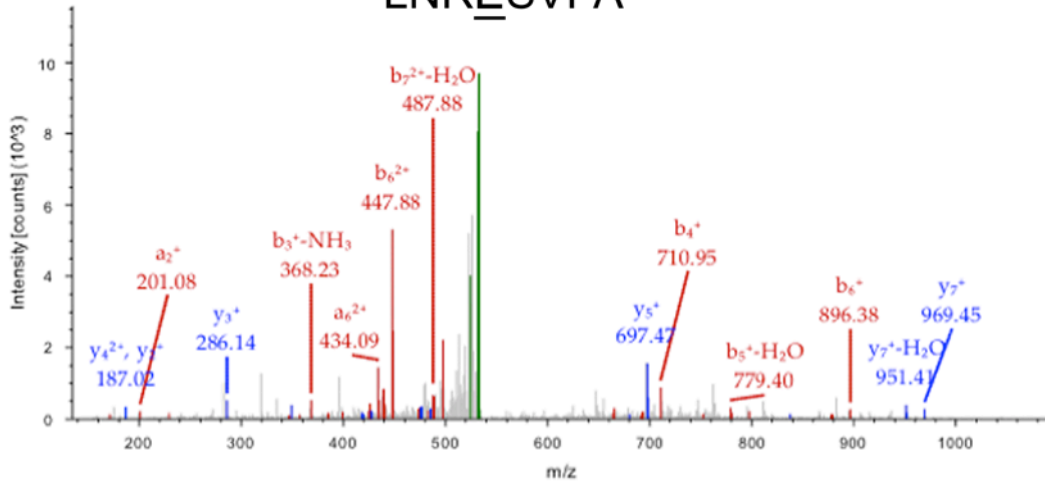

— Pre+H, Precursor, Precursor-H<sub>2</sub>O, Precursor-H<sub>2</sub>O-NH<sub>3</sub>, Precursor-NH<sub>3</sub>, Pre-H  
— y, y-H<sub>2</sub>O, y-NH<sub>3</sub>  
— a, a-H<sub>2</sub>O, a-NH<sub>3</sub>, b, b-H<sub>2</sub>O, b-NH<sub>3</sub>

| #1 | a <sup>+</sup>       | a <sup>2+</sup>      | b <sup>+</sup>       | b <sup>2+</sup>      | Seq.         | y <sup>+</sup>       | y <sup>2+</sup>      | #2 |
|----|----------------------|----------------------|----------------------|----------------------|--------------|----------------------|----------------------|----|
| 1  | 86.10                | 43.55                | 114.09               | 57.55                | L            |                      |                      | 8  |
| 2  | <b><u>201.12</u></b> | 101.07               | <b><u>229.12</u></b> | 115.06               | N-Deamidated | <b><u>969.35</u></b> | <b><u>485.18</u></b> | 7  |
| 3  | <b><u>357.22</u></b> | 179.12               | <b><u>385.22</u></b> | 193.11               | R            | 854.32               | <b><u>427.67</u></b> | 6  |
| 4  | 682.24               | 341.62               | <b><u>710.23</u></b> | 355.62               | E-Azilso     | <b><u>698.22</u></b> | <b><u>349.61</u></b> | 5  |
| 5  | 769.27               | <b><u>385.14</u></b> | <b><u>797.27</u></b> | <b><u>399.14</u></b> | S            | 373.21               | <b><u>187.11</u></b> | 4  |
| 6  | 868.34               | <b><u>434.67</u></b> | <b><u>896.33</u></b> | <b><u>448.67</u></b> | V            | <b><u>286.18</u></b> | 143.59               | 3  |
| 7  | 965.39               | <b><u>483.20</u></b> | 993.39               | <b><u>497.20</u></b> | P            | <b><u>187.11</u></b> | 94.06                | 2  |
| 8  |                      |                      |                      |                      | A            | 90.05                | 45.53                | 1  |

Fig S9. Identification of aziisoflurane adduct within the FLAG- $\alpha_1$  subunit of FLAG- $\alpha_1\beta_3\gamma_{2L}$ -L3-1D4 GABA<sub>A</sub> receptors photolabeled in the presence of 30  $\mu$ M aziisoflurane. Mass spectrum and corresponding peptide fragment table of peptides containing aziisoflurane  $\alpha_1$ -E285 adduct. Residue modified by photolabel derivative is in bold and underlined. Detected identified ions are colored and labeled accordingly. Residues detected with a modification are noted.



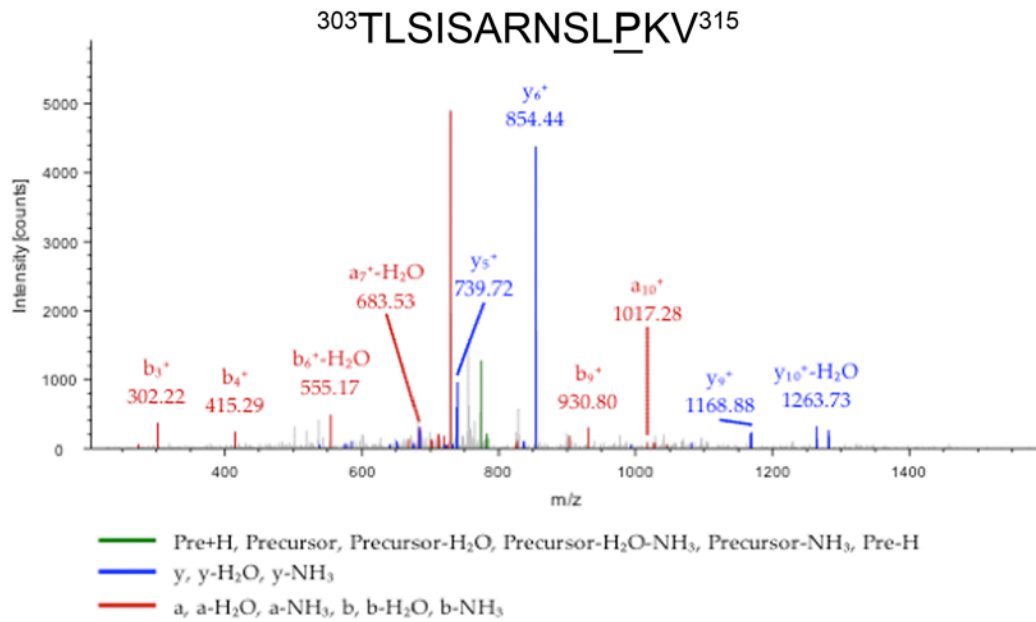

| #1 | a*             | a <sup>2</sup> * | b*             | b <sup>2</sup> * | Seq.         | y*             | y <sup>2</sup> * | #2 |
|----|----------------|------------------|----------------|------------------|--------------|----------------|------------------|----|
| 1  | 74.06          | 37.53            | 102.05         | 51.53            | T            |                |                  | 13 |
| 2  | 187.14         | 94.08            | 215.14         | 108.07           | L            | 1481.72        | 741.36           | 12 |
| 3  | 274.18         | 137.59           | <b>302.17</b>  | 151.59           | S            | 1368.63        | <b>684.82</b>    | 11 |
| 4  | 387.26         | 194.13           | <b>415.26</b>  | 208.13           | I            | <b>1281.60</b> | <b>641.31</b>    | 10 |
| 5  | 474.29         | 237.65           | 502.29         | 251.65           | S            | <b>1168.52</b> | <b>584.76</b>    | 9  |
| 6  | 545.33         | <b>273.17</b>    | 573.32         | 287.17           | A            | <b>1081.49</b> | 541.25           | 8  |
| 7  | <b>701.43</b>  | 351.22           | <b>729.43</b>  | 365.22           | R            | 1010.45        | 505.73           | 7  |
| 8  | 816.46         | 408.73           | 844.45         | 422.73           | N-Deamidated | <b>854.35</b>  | 427.68           | 6  |
| 9  | <b>903.49</b>  | 452.25           | <b>931.48</b>  | 466.25           | S            | <b>739.32</b>  | 370.16           | 5  |
| 10 | <b>1016.57</b> | 508.79           | <b>1044.57</b> | 522.79           | L            | <b>652.29</b>  | 326.65           | 4  |
| 11 | 1309.60        | 655.30           | 1337.59        | <b>669.30</b>    | P-Azilso     | <b>539.21</b>  | 270.11           | 3  |
| 12 | 1437.69        | <b>719.35</b>    | 1465.69        | 733.35           | K            | 246.18         | 123.59           | 2  |
| 13 |                |                  |                |                  | V            | 118.09         | 59.55            | 1  |

Fig S10. Identification of aziisoflurane adduct within the FLAG- $\alpha_1$  subunit of FLAG- $\alpha_1\beta_3\gamma_{2L}$ -L3-1D4 GABA<sub>A</sub> receptors photolabeled in the presence of 30  $\mu\text{M}$  aziisoflurane. Mass spectrum and corresponding peptide fragment table of peptides containing aziisoflurane  $\alpha_1$ -P313 adduct. Residue modified by photolabel derivative is in bold and underlined. Detected identified ions are colored and labeled accordingly. Residues detected with a modification are noted.

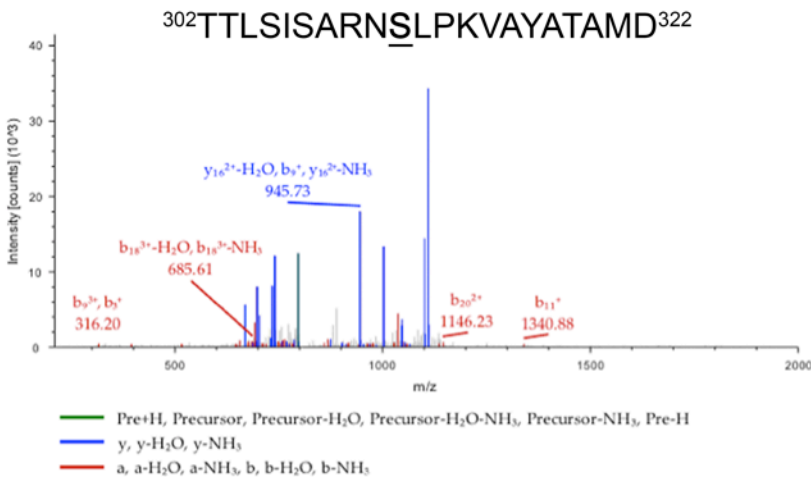

| #1 | a*            | a <sup>2+</sup> | a <sup>3+</sup> | b*             | b <sup>2+</sup> | b <sup>3+</sup> | Seq.         | y*            | y <sup>2+</sup> | y <sup>3+</sup> | #2 |
|----|---------------|-----------------|-----------------|----------------|-----------------|-----------------|--------------|---------------|-----------------|-----------------|----|
| 1  | 74.06         | 37.53           | 25.36           | 102.05         | 51.53           | 34.69           | T            |               |                 |                 | 21 |
| 2  | 175.11        | 88.06           | 59.04           | 203.10         | 102.05          | 68.37           | T            | 2322.05       | 1161.53         | <b>774.69</b>   | 20 |
| 3  | 288.19        | 144.60          | 96.74           | <b>316.19</b>  | 158.60          | 106.07          | L            | 2221.00       | <b>1111.01</b>  | <b>741.01</b>   | 19 |
| 4  | 375.22        | 188.12          | 125.75          | 403.22         | 202.11          | 135.08          | S            | 2107.92       | <b>1054.46</b>  | <b>703.31</b>   | 18 |
| 5  | 488.31        | 244.66          | 163.44          | <b>516.30</b>  | 258.66          | 172.77          | I            | 2020.89       | 1010.95         | 674.30          | 17 |
| 6  | 575.34        | 288.17          | 192.45          | 603.33         | 302.17          | 201.78          | S            | 1907.80       | <b>954.41</b>   | 636.61          | 16 |
| 7  | <b>646.38</b> | 323.69          | 216.13          | 674.37         | 337.69          | 225.46          | A            | 1820.77       | <b>910.89</b>   | 607.60          | 15 |
| 8  | 802.48        | 401.74          | 268.16          | 830.47         | 415.74          | 277.50          | R            | 1749.73       | <b>875.37</b>   | 583.92          | 14 |
| 9  | <b>917.51</b> | 459.26          | 306.51          | <b>945.50</b>  | 473.25          | <b>315.84</b>   | N-Deamidated | 1593.63       | <b>797.32</b>   | 531.88          | 13 |
| 10 | 1200.51       | 600.76          | 400.84          | 1228.50        | 614.76          | 410.17          | S-Azilso     | 1478.61       | <b>739.81</b>   | 493.54          | 12 |
| 11 | 1313.59       | 657.30          | 438.54          | <b>1341.59</b> | 671.30          | 447.87          | L            | 1195.60       | 598.31          | 399.21          | 11 |
| 12 | 1410.65       | 705.83          | 470.89          | 1438.64        | <b>719.82</b>   | 480.22          | P            | 1082.52       | 541.76          | 361.51          | 10 |
| 13 | 1538.74       | 769.87          | 513.58          | 1566.74        | <b>783.87</b>   | 522.92          | K            | <b>985.47</b> | 493.24          | 329.16          | 9  |
| 14 | 1637.81       | 819.41          | 546.61          | 1665.80        | 833.41          | 555.94          | V            | 857.37        | 429.19          | 286.46          | 8  |
| 15 | 1708.85       | 854.93          | 570.29          | 1736.84        | <b>868.92</b>   | 579.62          | A            | <b>758.30</b> | 379.65          | 253.44          | 7  |
| 16 | 1871.91       | 936.46          | 624.64          | 1899.90        | 950.46          | 633.97          | Y            | <b>687.27</b> | 344.14          | 229.76          | 6  |
| 17 | 1942.95       | <b>971.98</b>   | 648.32          | 1970.94        | 985.97          | 657.65          | A            | 524.20        | 262.60          | 175.41          | 5  |
| 18 | 2043.99       | 1022.50         | 682.00          | 2071.99        | <b>1036.50</b>  | <b>691.33</b>   | T            | 453.17        | 227.09          | 151.73          | 4  |
| 19 | 2115.03       | <b>1058.02</b>  | 705.68          | 2143.03        | 1072.02         | 715.01          | A            | 352.12        | 176.56          | 118.04          | 3  |
| 20 | 2262.07       | 1131.54         | <b>754.69</b>   | 2290.06        | <b>1145.53</b>  | <b>764.03</b>   | M-Oxidation  | 281.08        | 141.04          | 94.36           | 2  |
| 21 |               |                 |                 |                |                 |                 | D            | 134.04        | 67.53           | 45.35           | 1  |

Fig S11. Identification of aziisoflurane adduct within the FLAG- $\alpha_1$  subunit of FLAG- $\alpha_1\beta_3\gamma_{2L}$ -L3-1D4 GABA<sub>A</sub> receptors photolabeled in the presence of 30  $\mu\text{M}$  aziisoflurane. Mass spectrum and corresponding peptide fragment table of peptides containing aziisoflurane  $\alpha_1$ -S311 adduct. Residue modified by photolabel derivative is in bold and underlined. Detected identified ions are colored and labeled accordingly. Residues detected with a modification are noted.

**241RNIGYFILQ<sup>249</sup>**

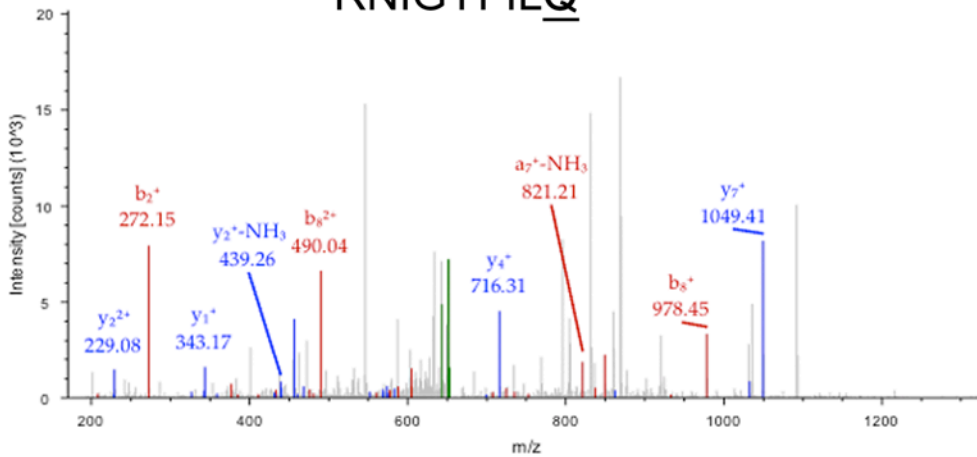

— Pre+H, Precursor, Precursor-H<sub>2</sub>O, Precursor-H<sub>2</sub>O-NH<sub>3</sub>, Precursor-NH<sub>3</sub>, Pre-H  
— y, y-NH<sub>3</sub>  
— a, a-NH<sub>3</sub>, b, b-NH<sub>3</sub>

| #1 | a*            | a <sup>2+</sup> | b*            | b <sup>2+</sup> | Seq.         | y*            | y <sup>2+</sup> | #2 |
|----|---------------|-----------------|---------------|-----------------|--------------|---------------|-----------------|----|
| 1  | 129.11        | 65.06           | 157.11        | 79.06           | R            |               |                 | 9  |
| 2  | 244.14        | 122.57          | <b>272.14</b> | 136.57          | N-Deamidated | 1164.48       | <b>582.74</b>   | 8  |
| 3  | 357.22        | 179.12          | <b>385.22</b> | 193.11          | I            | 1049.45       | 525.23          | 7  |
| 4  | 414.25        | <b>207.63</b>   | 442.24        | 221.62          | G            | 936.37        | <b>468.69</b>   | 6  |
| 5  | <b>577.31</b> | 289.16          | <b>605.30</b> | 303.16          | Y            | 879.35        | <b>440.18</b>   | 5  |
| 6  | <b>724.38</b> | 362.69          | <b>752.37</b> | <b>376.69</b>   | F            | 716.28        | <b>358.65</b>   | 4  |
| 7  | <b>837.46</b> | 419.23          | 865.46        | <b>433.23</b>   | I            | <b>569.22</b> | 285.11          | 3  |
| 8  | 950.55        | <b>475.78</b>   | <b>978.54</b> | <b>489.77</b>   | L            | 456.13        | <b>228.57</b>   | 2  |
| 9  |               |                 |               |                 | Q-Azilso     | <b>343.05</b> | 172.03          | 1  |

Fig S12. Identification of aziisoflurane adduct within the  $\beta_3$  subunits of FLAG- $\alpha_1\beta_3\gamma_{2L}$ -L3-1D4 GABA<sub>A</sub> receptors photolabeled in the presence of 30 $\mu$ M aziisoflurane. Mass spectrum and corresponding peptide fragment table of peptides containing aziisoflurane  $\beta_3$ -Q249 modification within the  $\beta_3$  subunit. Residue modified by photolabel derivative is in bold and underlined.

Detected identified ions are colored and labeled accordingly. Residues detected with a modification are noted.

274ARVALGITTTLTMTTINT<sup>291</sup>

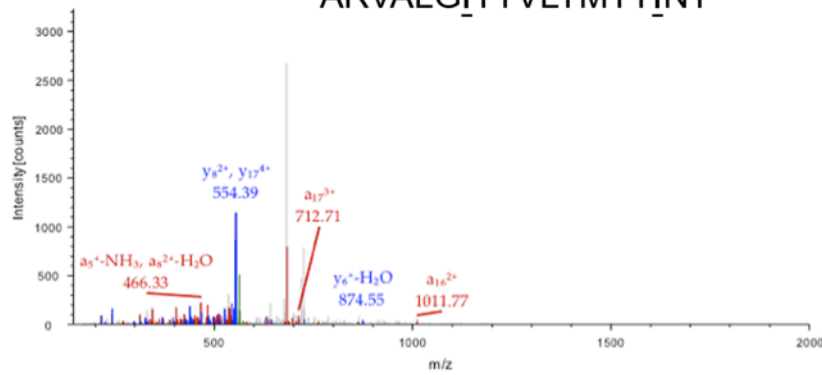

— Pre+H, Precursor, Precursor-H<sub>2</sub>O, Precursor-H<sub>2</sub>O-NH<sub>3</sub>, Precursor-NH<sub>3</sub>, Pre-H  
— y, y-H<sub>2</sub>O, y-NH<sub>3</sub>  
— a, a-H<sub>2</sub>O, a-NH<sub>3</sub>, b, b-H<sub>2</sub>O, b-NH<sub>3</sub>

| #1 | a <sup>+</sup> | a <sup>2+</sup> | a <sup>3+</sup> | a <sup>4+</sup> | b <sup>+</sup> | b <sup>2+</sup> | b <sup>3+</sup> | b <sup>4+</sup> | Seq.         | y <sup>-</sup> | y <sup>2+</sup> | y <sup>3+</sup> | y <sup>4+</sup> | #2 |
|----|----------------|-----------------|-----------------|-----------------|----------------|-----------------|-----------------|-----------------|--------------|----------------|-----------------|-----------------|-----------------|----|
| 1  | 44.05          | 22.53           | 15.35           | 11.77           | 72.04          | 36.53           | 24.69           | 18.77           | A            |                |                 |                 |                 | 18 |
| 2  | 200.15         | 100.58          | 67.39           | 50.79           | 228.15         | 114.58          | 76.72           | 57.79           | R            | 2213.94        | 1107.47         | 738.65          | <b>554.24</b>   | 17 |
| 3  | 299.22         | 150.11          | 100.41          | 75.56           | 327.21         | 164.11          | 109.74          | 82.56           | V            | 2057.84        | 1029.42         | 686.62          | <b>515.22</b>   | 16 |
| 4  | <b>370.26</b>  | 185.63          | 124.09          | 93.32           | 398.25         | 199.63          | 133.42          | 100.32          | A            | 1958.77        | 979.89          | 653.60          | <b>490.45</b>   | 15 |
| 5  | <b>483.34</b>  | <b>242.17</b>   | 161.78          | 121.59          | <b>511.34</b>  | 256.17          | 171.12          | 128.59          | L            | 1887.74        | 944.37          | <b>629.92</b>   | <b>472.69</b>   | 14 |
| 6  | <b>540.36</b>  | <b>270.68</b>   | 180.79          | 135.85          | 568.36         | 284.68          | 190.12          | 142.84          | G            | 1774.65        | 887.83          | 592.22          | <b>444.42</b>   | 13 |
| 7  | 849.42         | <b>425.21</b>   | 283.81          | 213.11          | 877.41         | <b>439.21</b>   | 293.14          | 220.11          | I-Azilso     | 1717.63        | 859.32          | <b>573.21</b>   | 430.16          | 12 |
| 8  | 950.46         | 475.74          | 317.49          | 238.37          | 978.46         | <b>489.73</b>   | <b>326.82</b>   | 245.37          | T            | 1408.57        | 704.79          | 470.20          | 352.90          | 11 |
| 9  | 1051.51        | <b>526.26</b>   | 351.18          | 263.63          | 1079.51        | <b>540.26</b>   | <b>360.51</b>   | <b>270.63</b>   | T            | 1307.53        | 654.27          | 436.51          | <b>327.64</b>   | 10 |
| 10 | 1150.58        | 575.79          | 384.20          | 288.40          | 1178.58        | 589.79          | 393.53          | 295.40          | V            | 1206.48        | 603.74          | 402.83          | 302.38          | 9  |
| 11 | 1263.67        | <b>632.34</b>   | <b>421.89</b>   | 316.67          | 1291.66        | 646.33          | <b>431.22</b>   | 323.67          | L            | 1107.41        | <b>554.21</b>   | <b>369.81</b>   | 277.61          | 8  |
| 12 | 1364.71        | <b>682.86</b>   | <b>455.58</b>   | <b>341.93</b>   | 1392.71        | <b>696.86</b>   | <b>464.91</b>   | 348.93          | T            | 994.33         | <b>497.67</b>   | <b>332.11</b>   | 249.34          | 7  |
| 13 | 1511.75        | 756.38          | 504.59          | 378.69          | 1539.74        | 770.38          | <b>513.92</b>   | 385.69          | M-Oxidation  | 893.28         | <b>447.14</b>   | <b>298.43</b>   | <b>224.08</b>   | 6  |
| 14 | 1612.80        | 806.90          | <b>538.27</b>   | <b>403.95</b>   | 1640.79        | 820.90          | <b>547.60</b>   | 410.95          | T            | 746.24         | 373.63          | 249.42          | 187.32          | 5  |
| 15 | 1713.84        | 857.43          | <b>571.95</b>   | <b>429.22</b>   | 1741.84        | 871.42          | <b>581.28</b>   | 436.22          | T            | <b>645.20</b>  | 323.10          | <b>215.74</b>   | 162.05          | 4  |
| 16 | 2022.90        | <b>1011.95</b>  | 674.97          | <b>506.48</b>   | 2050.89        | 1025.95         | 684.30          | <b>513.48</b>   | I-Azilso     | <b>544.15</b>  | 272.58          | 182.05          | 136.79          | 3  |
| 17 | 2137.93        | 1069.47         | <b>713.31</b>   | <b>535.24</b>   | 2165.92        | 1083.46         | 722.65          | <b>542.24</b>   | N-Deamidated | 235.09         | 118.05          | 79.04           | 59.53           | 2  |
| 18 |                |                 |                 |                 |                |                 |                 |                 | T            | 120.07         | 60.54           | 40.69           | 30.77           | 1  |

Fig S13. Identification of aziisoflurane adducts within the  $\beta_3$  subunits of FLAG- $\alpha_1\beta_3\gamma_{2L}$ -L3-1D4 GABA<sub>A</sub> receptors photolabeled in the presence of 30  $\mu$ M aziisoflurane. Mass spectrum and corresponding peptide fragment table of peptides containing aziisoflurane  $\beta_3$ -I280/ $\beta_3$ -I289(B), modification within the  $\beta_3$  subunit. Residue modified by photolabel derivative is in bold and underlined. Detected identified ions are colored and labeled accordingly. Residues detected with a modification are noted.

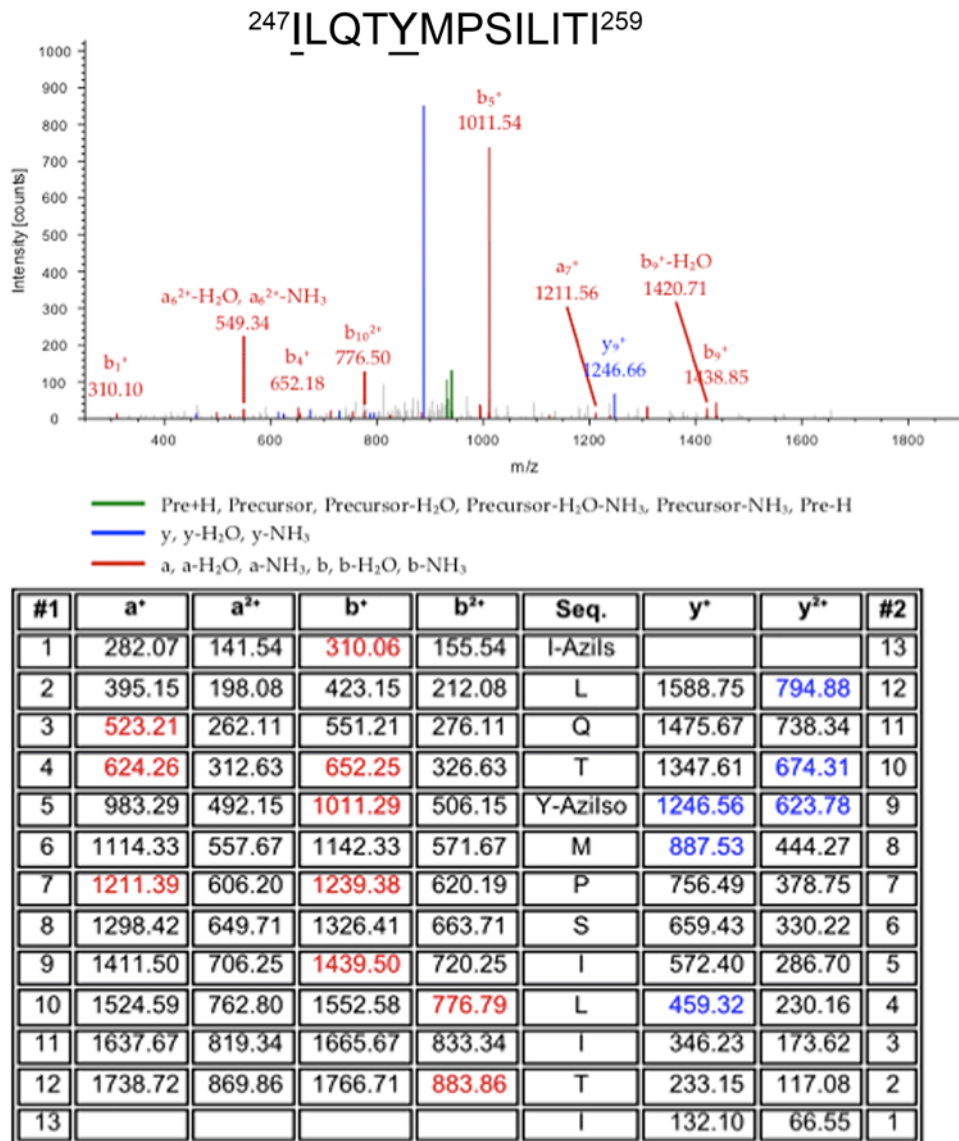

Fig S14. Identification of aziisoflurane adducts within the  $\beta_3$  subunits of FLAG- $\alpha_1\beta_3\gamma_{2L}$ -L3-1D4 GABA<sub>A</sub> receptors photolabeled in the presence of 30 $\mu$ M aziisoflurane. Mass spectrum and corresponding peptide fragment table of peptides containing aziisoflurane  $\beta_3$ -I247/  $\beta_3$ -Y251 modification within the  $\beta_3$  subunit. Residue modified by photolabel derivative is in bold and underlined. Detected identified ions are colored and labeled accordingly. Residues detected with a modification are noted.



<sup>271</sup>RMGYFTIQTYIPCTLIVVLS<sup>290</sup>

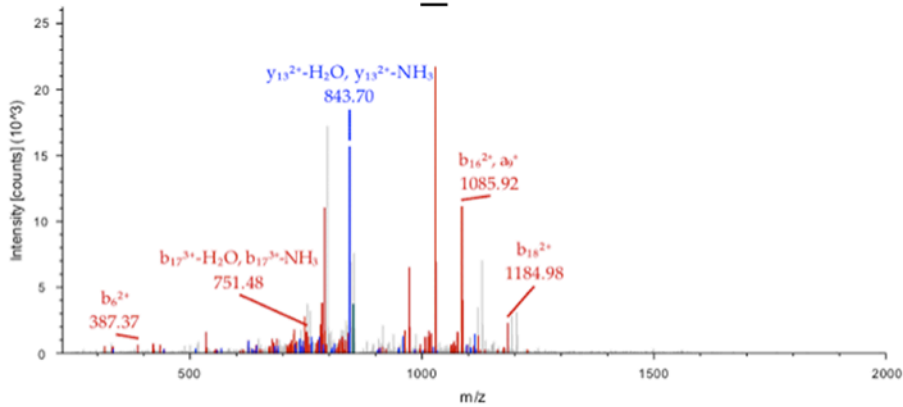

— Pre+H, Precursor, Precursor-H<sub>2</sub>O, Precursor-H<sub>2</sub>O-NH<sub>3</sub>, Precursor-NH<sub>3</sub>, Pre-H  
 — y, y-H<sub>2</sub>O, y-NH<sub>3</sub>  
 — a, a-H<sub>2</sub>O, a-NH<sub>3</sub>, b, b-H<sub>2</sub>O, b-NH<sub>3</sub>

| #1 | a*             | a <sup>2+</sup> | a <sup>3+</sup> | b*             | b <sup>2+</sup> | b <sup>3+</sup> | Seq.              | y*             | y <sup>2+</sup> | y <sup>3+</sup> | #2 |
|----|----------------|-----------------|-----------------|----------------|-----------------|-----------------|-------------------|----------------|-----------------|-----------------|----|
| 1  | 129.11         | 65.06           | 43.71           | 157.11         | 79.06           | 53.04           | R                 |                |                 |                 | 20 |
| 2  | 276.15         | 138.58          | 92.72           | 304.14         | 152.58          | 102.05          | M-Oxidation       | 2431.12        | 1216.06         | <b>811.04</b>   | 19 |
| 3  | <b>333.17</b>  | 167.09          | 111.73          | 361.17         | 181.09          | 121.06          | G                 | 2284.08        | 1142.54         | <b>762.03</b>   | 18 |
| 4  | 496.23         | 248.62          | 166.08          | 524.23         | 262.62          | 175.41          | Y                 | 2227.06        | <b>1114.03</b>  | <b>743.02</b>   | 17 |
| 5  | <b>643.30</b>  | 322.15          | 215.11          | <b>671.30</b>  | 336.15          | 224.44          | F                 | 2064.00        | <b>1032.50</b>  | <b>688.67</b>   | 16 |
| 6  | <b>744.35</b>  | 372.68          | 248.79          | <b>772.34</b>  | <b>386.68</b>   | 258.12          | T                 | 1916.93        | <b>958.97</b>   | <b>639.65</b>   | 15 |
| 7  | 857.43         | 429.22          | 286.48          | 885.43         | <b>443.22</b>   | 295.81          | I                 | 1815.88        | <b>908.44</b>   | 605.96          | 14 |
| 8  | <b>985.49</b>  | 493.25          | 329.17          | <b>1013.49</b> | 507.25          | 338.50          | Q                 | 1702.80        | <b>851.90</b>   | <b>568.27</b>   | 13 |
| 9  | <b>1086.54</b> | 543.77          | 362.85          | <b>1114.54</b> | <b>557.77</b>   | 372.18          | T                 | 1574.74        | <b>787.87</b>   | 525.58          | 12 |
| 10 | 1445.57        | <b>723.29</b>   | 482.53          | 1473.57        | <b>737.29</b>   | 491.86          | Y-Azilso          | 1473.69        | <b>737.35</b>   | 491.90          | 11 |
| 11 | 1558.66        | <b>779.83</b>   | 520.22          | 1586.65        | <b>793.83</b>   | 529.56          | I                 | <b>1114.65</b> | <b>557.83</b>   | 372.22          | 10 |
| 12 | 1655.71        | <b>828.36</b>   | <b>552.58</b>   | 1683.71        | <b>842.36</b>   | 561.91          | P                 | <b>1001.57</b> | 501.29          | <b>334.53</b>   | 9  |
| 13 | 1815.74        | <b>908.37</b>   | 605.92          | 1843.74        | <b>922.37</b>   | <b>615.25</b>   | C-Carbamidomethyl | <b>904.52</b>  | 452.76          | 302.18          | 8  |
| 14 | 1916.79        | <b>958.90</b>   | <b>639.60</b>   | 1944.78        | <b>972.90</b>   | <b>648.93</b>   | T                 | <b>744.49</b>  | 372.75          | 248.83          | 7  |
| 15 | 2029.87        | <b>1015.44</b>  | <b>677.30</b>   | 2057.87        | <b>1029.44</b>  | <b>686.63</b>   | L                 | <b>643.44</b>  | 322.22          | 215.15          | 6  |
| 16 | 2142.96        | <b>1071.98</b>  | <b>714.99</b>   | 2170.95        | <b>1085.98</b>  | <b>724.32</b>   | I                 | 530.35         | 265.68          | 177.46          | 5  |
| 17 | 2242.03        | <b>1121.52</b>  | <b>748.01</b>   | 2270.02        | <b>1135.51</b>  | <b>757.35</b>   | V                 | 417.27         | 209.14          | 139.76          | 4  |
| 18 | 2341.10        | 1171.05         | <b>781.04</b>   | 2369.09        | <b>1185.05</b>  | <b>790.37</b>   | V                 | 318.20         | 159.60          | 106.74          | 3  |
| 19 | 2454.18        | <b>1227.59</b>  | <b>818.73</b>   | 2482.17        | 1241.59         | <b>828.06</b>   | L                 | 219.13         | 110.07          | 73.72           | 2  |
| 20 |                |                 |                 |                |                 |                 | S                 | 106.05         | 53.53           | 36.02           | 1  |

Fig S15. Identification of aziisoflurane adducts within the  $\gamma_{2L}$ -L3-1D4 subunit of FLAG- $\alpha_1\beta_3\gamma_{2L}$ -L3-1D4 GABA<sub>A</sub> receptors photolabeled in the presence of 30  $\mu$ M aziisoflurane. Mass spectrum and corresponding peptide fragment table of peptides containing aziisoflurane  $\gamma_{2L}$ -Y280 modification within the  $\gamma_{2L}$ -L3-1D4 subunit. Residue modified by photolabel derivative is in bold and underlined. Detected identified ions are colored and labeled accordingly. Residues detected with a modification are noted.

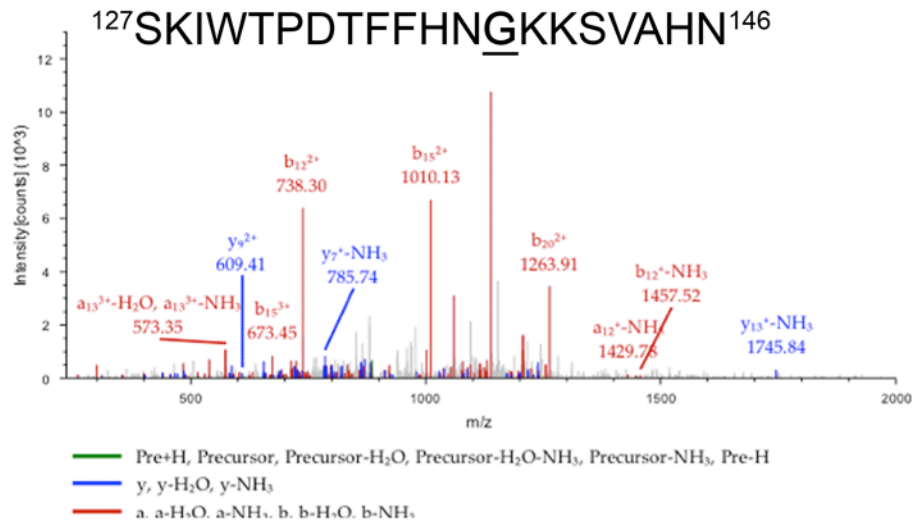

| #1 | a*             | a <sup>+</sup> | a <sup>+</sup> | b*             | b <sup>+</sup> | b <sup>+</sup> | Seq.        | y*             | y <sup>+</sup> | y <sup>+</sup> | #2 |
|----|----------------|----------------|----------------|----------------|----------------|----------------|-------------|----------------|----------------|----------------|----|
| 1  | 60.04          | 30.53          | 20.69          | 88.04          | 44.52          | 30.02          | S           |                |                |                | 21 |
| 2  | 188.14         | 94.57          | 63.38          | 216.13         | 108.57         | 72.72          | K           | 2604.17        | 1302.59        | <b>868.73</b>  | 20 |
| 3  | 301.22         | 151.12         | 101.08         | 329.22         | 165.11         | 110.41         | I           | 2476.08        | <b>1238.54</b> | 826.03         | 19 |
| 4  | <b>487.30</b>  | 244.16         | 163.11         | <b>515.30</b>  | <b>258.15</b>  | 172.44         | W           | 2362.99        | <b>1182.00</b> | <b>788.34</b>  | 18 |
| 5  | <b>588.35</b>  | 294.68         | 196.79         | 616.35         | 308.68         | 206.12         | T           | 2176.92        | <b>1088.96</b> | <b>726.31</b>  | 17 |
| 6  | <b>685.40</b>  | 343.21         | 229.14         | <b>713.40</b>  | 357.20         | 238.47         | P           | 2075.87        | <b>1038.44</b> | <b>692.63</b>  | 16 |
| 7  | <b>800.43</b>  | <b>400.72</b>  | 267.48         | 828.43         | 414.72         | 276.81         | D           | 1978.82        | 989.91         | 660.28         | 15 |
| 8  | 901.48         | 451.24         | 301.16         | 929.47         | 465.24         | <b>310.50</b>  | T           | 1863.79        | 932.40         | 621.93         | 14 |
| 9  | <b>1048.55</b> | 524.78         | 350.19         | <b>1076.54</b> | <b>538.77</b>  | 359.52         | F           | 1762.74        | <b>881.87</b>  | <b>588.25</b>  | 13 |
| 10 | <b>1195.61</b> | 598.31         | <b>399.21</b>  | <b>1223.61</b> | 612.31         | 408.54         | F           | 1615.67        | <b>808.34</b>  | 539.23         | 12 |
| 11 | 1332.67        | 666.84         | 444.90         | 1360.67        | 680.84         | 454.23         | H           | 1468.60        | <b>734.81</b>  | 490.21         | 11 |
| 12 | <b>1446.72</b> | <b>723.86</b>  | <b>482.91</b>  | 1474.71        | <b>737.86</b>  | <b>492.24</b>  | N           | 1331.54        | 666.28         | 444.52         | 10 |
| 13 | 1733.74        | <b>867.37</b>  | 578.58         | 1761.73        | <b>881.37</b>  | <b>587.92</b>  | G-AziSev    | <b>1217.50</b> | <b>609.25</b>  | 406.51         | 9  |
| 14 | 1861.83        | 931.42         | 621.28         | 1889.83        | 945.42         | <b>630.61</b>  | K           | <b>930.48</b>  | <b>465.74</b>  | <b>310.83</b>  | 8  |
| 15 | 1989.93        | 995.47         | 663.98         | 2017.92        | <b>1009.46</b> | <b>673.31</b>  | K           | <b>802.39</b>  | <b>401.70</b>  | 268.13         | 7  |
| 16 | 2076.96        | <b>1038.98</b> | <b>692.99</b>  | 2104.95        | <b>1052.98</b> | <b>702.32</b>  | S           | <b>674.29</b>  | 337.65         | 225.44         | 6  |
| 17 | 2176.03        | <b>1088.52</b> | <b>726.01</b>  | 2204.02        | <b>1102.51</b> | <b>735.35</b>  | V           | <b>587.26</b>  | 294.13         | 196.43         | 5  |
| 18 | 2247.06        | <b>1124.04</b> | <b>749.69</b>  | 2275.06        | <b>1138.03</b> | 759.02         | A           | <b>488.19</b>  | 244.60         | 163.40         | 4  |
| 19 | 2384.12        | 1192.56        | <b>795.38</b>  | 2412.12        | <b>1206.56</b> | <b>804.71</b>  | H           | 417.16         | 209.08         | 139.72         | 3  |
| 20 | 2498.17        | 1249.59        | <b>833.39</b>  | 2526.16        | <b>1263.58</b> | <b>842.72</b>  | N           | 280.10         | 140.55         | 94.04          | 2  |
| 21 |                |                |                |                |                |                | M-Oxidation | 166.05         | 83.53          | 56.02          | 1  |

Fig S16. Identification of azisevoflurane adduct within the FLAG- $\alpha_1$  subunit of FLAG- $\alpha_1\beta_3$  GABA<sub>A</sub> receptors photolabeled in the presence of 30  $\mu$ M azisevoflurane. Mass spectrum and corresponding peptide fragment table of peptides containing aziisoflurane  $\alpha$ 1-G139. Residue modified by photolabel derivative is in bold and underlined. Detected identified ions are colored and labeled accordingly. Residues detected with a modification are noted.

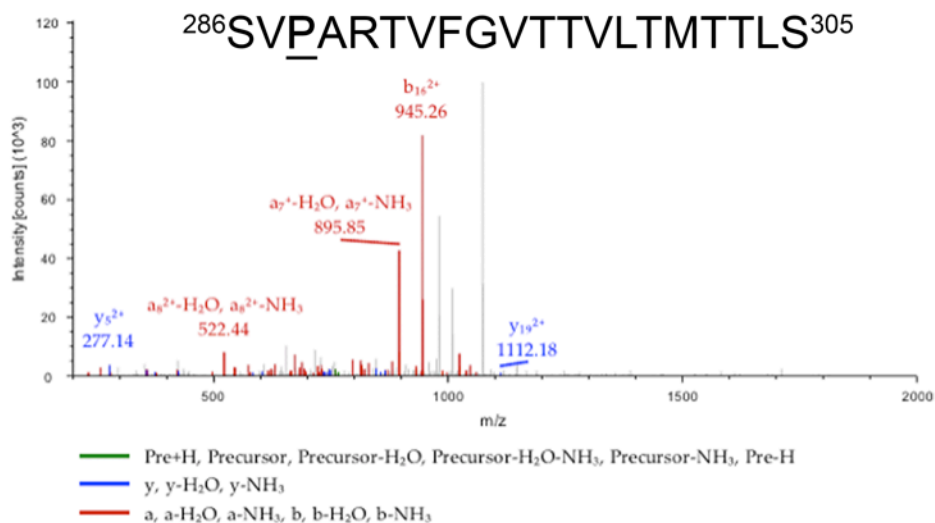

| #1 | a <sup>+</sup> | a <sup>2+</sup> | a <sup>3+</sup> | b <sup>+</sup> | b <sup>2+</sup> | b <sup>3+</sup> | Seq.     | y <sup>+</sup> | y <sup>2+</sup> | y <sup>3+</sup> | #2 |
|----|----------------|-----------------|-----------------|----------------|-----------------|-----------------|----------|----------------|-----------------|-----------------|----|
| 1  | 60.04          | 30.53           | 20.69           | 88.04          | 44.52           | 30.02           | S        |                |                 |                 | 20 |
| 2  | 159.11         | 80.06           | 53.71           | 187.11         | 94.06           | 63.04           | V        | 2224.10        | 1112.55         | 742.04          | 19 |
| 3  | 486.16         | 243.59          | 162.73          | 514.16         | 257.58          | 172.06          | P-AziSev | 2125.03        | 1063.02         | 709.01          | 18 |
| 4  | 557.20         | 279.10          | 186.41          | 585.20         | 293.10          | 195.74          | A        | 1797.98        | 899.49          | 600.00          | 17 |
| 5  | 713.30         | 357.15          | 238.44          | 741.30         | 371.15          | 247.77          | R        | 1726.94        | 863.97          | 576.32          | 16 |
| 6  | 814.35         | 407.68          | 272.12          | 842.34         | 421.68          | 281.45          | T        | 1570.84        | 785.92          | 524.28          | 15 |
| 7  | 913.42         | 457.21          | 305.14          | 941.41         | 471.21          | 314.48          | V        | 1469.79        | 735.40          | 490.60          | 14 |
| 8  | 1060.49        | 530.75          | 354.17          | 1088.48        | 544.74          | 363.50          | F        | 1370.72        | 685.87          | 457.58          | 13 |
| 9  | 1117.51        | 559.26          | 373.17          | 1145.50        | 573.25          | 382.51          | G        | 1223.66        | 612.33          | 408.56          | 12 |
| 10 | 1216.58        | 608.79          | 406.20          | 1244.57        | 622.79          | 415.53          | V        | 1166.63        | 583.82          | 389.55          | 11 |
| 11 | 1317.62        | 659.32          | 439.88          | 1345.62        | 673.31          | 449.21          | T        | 1067.57        | 534.29          | 356.53          | 10 |
| 12 | 1418.67        | 709.84          | 473.56          | 1446.67        | 723.84          | 482.89          | T        | 966.52         | 483.76          | 322.84          | 9  |
| 13 | 1517.74        | 759.37          | 506.58          | 1545.73        | 773.37          | 515.92          | V        | 865.47         | 433.24          | 289.16          | 8  |
| 14 | 1630.82        | 815.92          | 544.28          | 1658.82        | 829.91          | 553.61          | L        | 766.40         | 383.70          | 256.14          | 7  |
| 15 | 1731.87        | 866.44          | 577.96          | 1759.87        | 880.44          | 587.29          | T        | 653.32         | 327.16          | 218.44          | 6  |
| 16 | 1862.91        | 931.96          | 621.64          | 1890.91        | 945.96          | 630.97          | M        | 552.27         | 276.64          | 184.76          | 5  |
| 17 | 1963.96        | 982.48          | 655.32          | 1991.95        | 996.48          | 664.66          | T        | 421.23         | 211.12          | 141.08          | 4  |
| 18 | 2065.01        | 1033.01         | 689.01          | 2093.00        | 1047.00         | 698.34          | T        | 320.18         | 160.59          | 107.40          | 3  |
| 19 | 2178.09        | 1089.55         | 726.70          | 2206.09        | 1103.55         | 736.03          | L        | 219.13         | 110.07          | 73.72           | 2  |
| 20 |                |                 |                 |                |                 |                 | S        | 106.05         | 53.53           | 36.02           | 1  |

Fig S17. Identification of azisevoflurane adduct within the FLAG- $\alpha_1$  subunit of FLAG- $\alpha_1\beta_3$  GABA<sub>A</sub> receptors photolabeled in the presence of 30  $\mu\text{M}$  azisevoflurane. Mass spectrum and corresponding peptide fragment table of peptides containing aziisoflurane  $\alpha 1$ -P288 adduct. Residue modified by photolabel derivative is in bold and underlined. Detected identified ions are colored and labeled accordingly. Residues detected with a modification are noted.



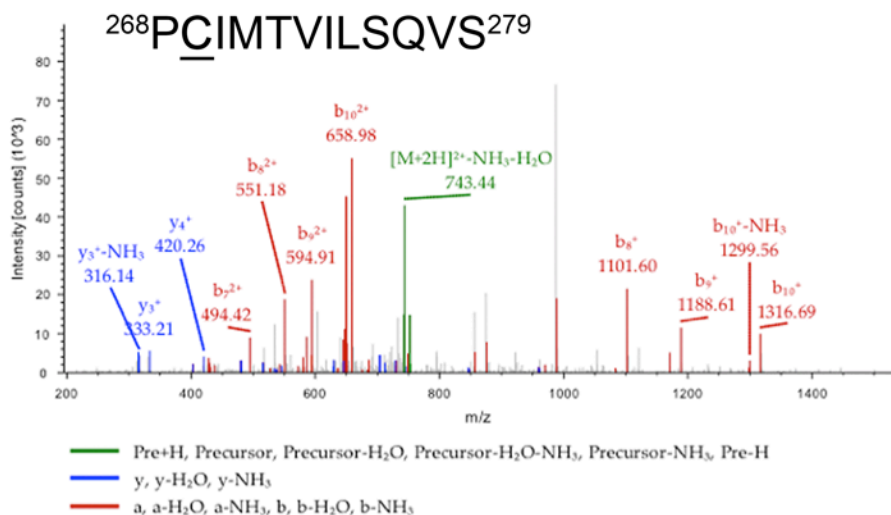

| #1 | a*                   | a <sup>2+</sup>      | b*                    | b <sup>2+</sup>      | Seq.     | y*                   | y <sup>2+</sup>      | #2 |
|----|----------------------|----------------------|-----------------------|----------------------|----------|----------------------|----------------------|----|
| 1  | 70.07                | 35.54                | 98.06                 | 49.53                | P        |                      |                      | 12 |
| 2  | <b><u>403.07</u></b> | 202.04               | <b><u>431.07</u></b>  | 216.04               | C-AziSev | 1423.62              | <b><u>712.32</u></b> | 11 |
| 3  | <b><u>516.16</u></b> | 258.58               | 544.15                | 272.58               | I        | 1090.62              | <b><u>545.81</u></b> | 10 |
| 4  | <b><u>647.20</u></b> | 324.10               | <b><u>675.19</u></b>  | 338.10               | M        | 977.53               | 489.27               | 9  |
| 5  | <b><u>748.24</u></b> | 374.63               | 776.24                | 388.62               | T        | <b><u>846.49</u></b> | 423.75               | 8  |
| 6  | <b><u>847.31</u></b> | 424.16               | <b><u>875.31</u></b>  | <b><u>438.16</u></b> | V        | <b><u>745.45</u></b> | 373.23               | 7  |
| 7  | <b><u>960.40</u></b> | <b><u>480.70</u></b> | <b><u>988.39</u></b>  | <b><u>494.70</u></b> | I        | <b><u>646.38</u></b> | 323.69               | 6  |
| 8  | 1073.48              | <b><u>537.24</u></b> | <b><u>1101.48</u></b> | <b><u>551.24</u></b> | L        | <b><u>533.29</u></b> | 267.15               | 5  |
| 9  | 1160.51              | <b><u>580.76</u></b> | <b><u>1188.51</u></b> | <b><u>594.76</u></b> | S        | <b><u>420.21</u></b> | 210.61               | 4  |
| 10 | 1288.57              | <b><u>644.79</u></b> | <b><u>1316.57</u></b> | <b><u>658.79</u></b> | Q        | <b><u>333.18</u></b> | 167.09               | 3  |
| 11 | 1387.64              | 694.32               | 1415.63               | 708.32               | V        | 205.12               | 103.06               | 2  |
| 12 |                      |                      |                       |                      | S        | 106.05               | 53.53                | 1  |

Fig S18. Identification of azisevoflurane adduct within the FLAG- $\alpha_1$  subunit of FLAG- $\alpha_1\beta_3$  GABA<sub>A</sub> receptors photolabeled in the presence of 30  $\mu$ M azisevoflurane. Mass spectrum and corresponding peptide fragment table of peptides containing aziisoflurane  $\alpha_1$ -C269 adduct. Residue modified by photolabel derivative is in bold and underlined. Detected identified ions are colored and labeled accordingly. Residues detected with a modification are noted.

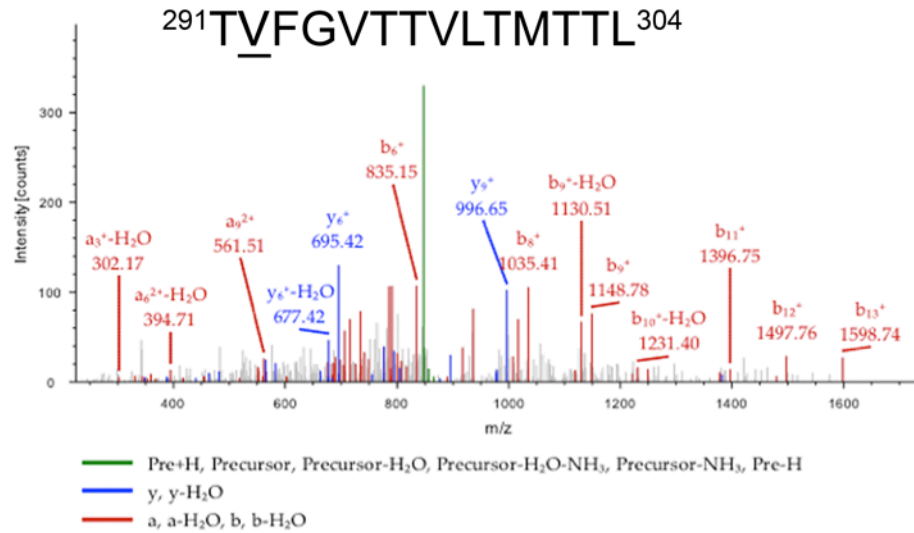

| #1 | a*             | a <sup>2+</sup> * | b*             | b <sup>2+</sup> * | Seq.        | y*             | y <sup>2+</sup> * | #2 |
|----|----------------|-------------------|----------------|-------------------|-------------|----------------|-------------------|----|
| 1  | 74.06          | 37.53             | 102.05         | 51.53             | T           |                |                   | 14 |
| 2  | 403.13         | 202.07            | 431.12         | 216.06            | V-AziSev    | 1628.75        | 814.88            | 13 |
| 3  | 550.19         | 275.60            | <b>578.19</b>  | 289.60            | F           | 1299.69        | <b>650.35</b>     | 12 |
| 4  | 607.22         | 304.11            | <b>635.21</b>  | 318.11            | G           | <b>1152.62</b> | <b>576.81</b>     | 11 |
| 5  | <b>706.28</b>  | <b>353.65</b>     | <b>734.28</b>  | <b>367.64</b>     | V           | 1095.60        | <b>548.30</b>     | 10 |
| 6  | <b>807.33</b>  | 404.17            | <b>835.33</b>  | <b>418.17</b>     | T           | <b>996.53</b>  | 498.77            | 9  |
| 7  | 908.38         | <b>454.69</b>     | <b>936.37</b>  | 468.69            | T           | <b>895.48</b>  | 448.24            | 8  |
| 8  | <b>1007.45</b> | 504.23            | <b>1035.44</b> | <b>518.23</b>     | V           | <b>794.43</b>  | 397.72            | 7  |
| 9  | <b>1120.53</b> | <b>560.77</b>     | <b>1148.53</b> | 574.77            | L           | <b>695.36</b>  | <b>348.19</b>     | 6  |
| 10 | <b>1221.58</b> | 611.29            | <b>1249.58</b> | 625.29            | T           | <b>582.28</b>  | 291.64            | 5  |
| 11 | 1368.62        | <b>684.81</b>     | <b>1396.61</b> | <b>698.81</b>     | M-Oxidation | <b>481.23</b>  | 241.12            | 4  |
| 12 | 1469.66        | <b>735.34</b>     | <b>1497.66</b> | <b>749.33</b>     | T           | 334.20         | 167.60            | 3  |
| 13 | 1570.71        | <b>785.86</b>     | <b>1598.71</b> | <b>799.86</b>     | T           | 233.15         | 117.08            | 2  |
| 14 |                |                   |                |                   | L           | 132.10         | 66.55             | 1  |

Fig S19. Identification of azisevoflurane adduct within the FLAG- $\alpha_1$  subunit of FLAG- $\alpha_1\beta_3$  GABA<sub>A</sub> receptors photolabeled in the presence of 30  $\mu\text{M}$  azisevoflurane. Mass spectrum and corresponding peptide fragment table of peptides containing aziisoflurane  $\alpha_1$ -V292 adduct. Residue modified by photolabel derivative is in bold and underlined. Detected identified ions are colored and labeled accordingly. Residues detected with a modification are noted.

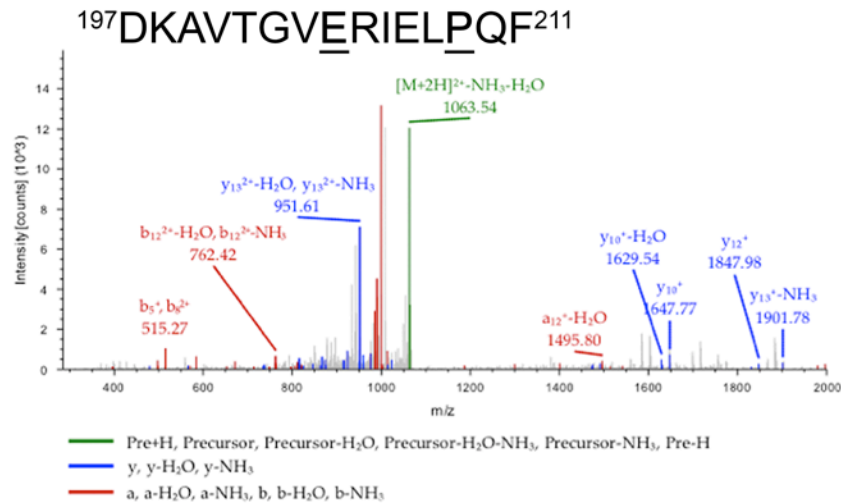

| #1 | a <sup>+</sup> | a <sup>2+</sup> | b <sup>+</sup> | b <sup>2+</sup> | Seq.     | y <sup>+</sup> | y <sup>2+</sup> | #2 |
|----|----------------|-----------------|----------------|-----------------|----------|----------------|-----------------|----|
| 1  | 88.04          | 44.52           | 116.03         | 58.52           | D        |                |                 | 15 |
| 2  | 216.13         | 108.57          | 244.13         | 122.57          | K        | 2046.89        | 1023.95         | 14 |
| 3  | 287.17         | 144.09          | 315.17         | 158.09          | A        | 1918.79        | 959.90          | 13 |
| 4  | 386.24         | 193.62          | 414.23         | 207.62          | V        | 1847.75        | 924.38          | 12 |
| 5  | 487.29         | 244.15          | <b>515.28</b>  | 258.14          | T        | 1748.69        | 874.85          | 11 |
| 6  | 544.31         | 272.66          | 572.30         | 286.66          | G        | 1647.64        | 824.32          | 10 |
| 7  | 643.38         | 322.19          | <b>671.37</b>  | 336.19          | V        | 1590.62        | 795.81          | 9  |
| 8  | <b>1002.42</b> | 501.71          | 1030.41        | <b>515.71</b>   | E-AziSev | 1491.55        | 746.28          | 8  |
| 9  | 1158.52        | 579.76          | <b>1186.51</b> | 593.76          | R        | 1132.51        | 566.76          | 7  |
| 10 | 1271.60        | 636.31          | <b>1299.60</b> | 650.30          | I        | 976.41         | 488.71          | 6  |
| 11 | <b>1400.65</b> | 700.83          | 1428.64        | <b>714.82</b>   | E        | 863.32         | 432.16          | 5  |
| 12 | <b>1513.73</b> | 757.37          | <b>1541.72</b> | 771.37          | L        | 734.28         | 367.64          | 4  |
| 13 | 1840.78        | <b>920.89</b>   | 1868.78        | <b>934.89</b>   | P-AziSev | 621.20         | 311.10          | 3  |
| 14 | 1968.84        | <b>984.92</b>   | <b>1996.83</b> | <b>998.92</b>   | Q        | 294.14         | 147.58          | 2  |
| 15 |                |                 |                |                 | F        | 166.09         | 83.55           | 1  |

Fig S20. Identification of azisevoflurane adduct within the  $\beta_3$  subunit of FLAG- $\alpha_1\beta_3$  GABA<sub>A</sub> receptors photolabeled in the presence of 30  $\mu$ M azisevoflurane. Mass spectrum and corresponding peptide fragment table of aziisoflurane peptide containing  $\beta_3$ -E204/  $\beta_3$ -P209 adducts. Residue modified by photolabel derivative is in bold and underlined. Detected identified ions are colored and labeled accordingly. Residues detected with a modification are noted.

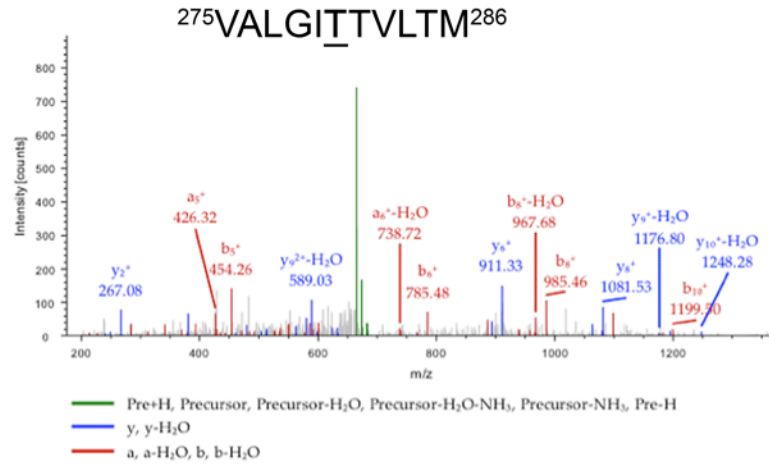

| #1 | a*            | a <sup>+</sup> * | b*             | b <sup>+</sup> * | Seq.        | y*             | y <sup>+</sup> * | #2 |
|----|---------------|------------------|----------------|------------------|-------------|----------------|------------------|----|
| 1  | 72.08         | 36.54            | 100.08         | 50.54            | V           |                |                  | 11 |
| 2  | 143.12        | 72.06            | 171.11         | 86.06            | A           | 1265.57        | <b>633.29</b>    | 10 |
| 3  | 256.20        | 128.60           | <b>284.20</b>  | 142.60           | L           | <b>1194.54</b> | <b>597.77</b>    | 9  |
| 4  | <b>313.22</b> | 157.12           | <b>341.22</b>  | 171.11           | G           | <b>1081.45</b> | 541.23           | 8  |
| 5  | <b>426.31</b> | <b>213.66</b>    | <b>454.30</b>  | <b>227.65</b>    | I           | 1024.43        | <b>512.72</b>    | 7  |
| 6  | 757.35        | <b>379.18</b>    | <b>785.35</b>  | <b>393.18</b>    | T-AziSev    | <b>911.35</b>  | 456.18           | 6  |
| 7  | 858.40        | <b>429.70</b>    | <b>886.40</b>  | <b>443.70</b>    | T           | <b>580.30</b>  | 290.65           | 5  |
| 8  | <b>957.47</b> | <b>479.24</b>    | <b>985.46</b>  | <b>493.24</b>    | V           | <b>479.25</b>  | <b>240.13</b>    | 4  |
| 9  | 1070.55       | <b>535.78</b>    | <b>1098.55</b> | <b>549.78</b>    | L           | <b>380.19</b>  | 190.60           | 3  |
| 10 | 1171.60       | <b>586.30</b>    | <b>1199.60</b> | <b>600.30</b>    | T           | <b>267.10</b>  | 134.05           | 2  |
| 11 |               |                  |                |                  | M-Oxidation | 166.05         | 83.53            | 1  |

Fig S21. Identification of azisevoflurane adduct within the  $\beta_3$  subunit of FLAG- $\alpha_1\beta_3$  GABA<sub>A</sub> receptors photolabeled in the presence of 30  $\mu\text{M}$  azisevoflurane. Mass spectrum and corresponding peptide fragment table of aziisoflurane peptide containing  $\beta_3$ -T280(B),  $\beta_3$ -L442 adducts. Residue modified by photolabel derivative is in bold and underlined. Detected identified ions are colored and labeled accordingly. Residues detected with a modification are noted.

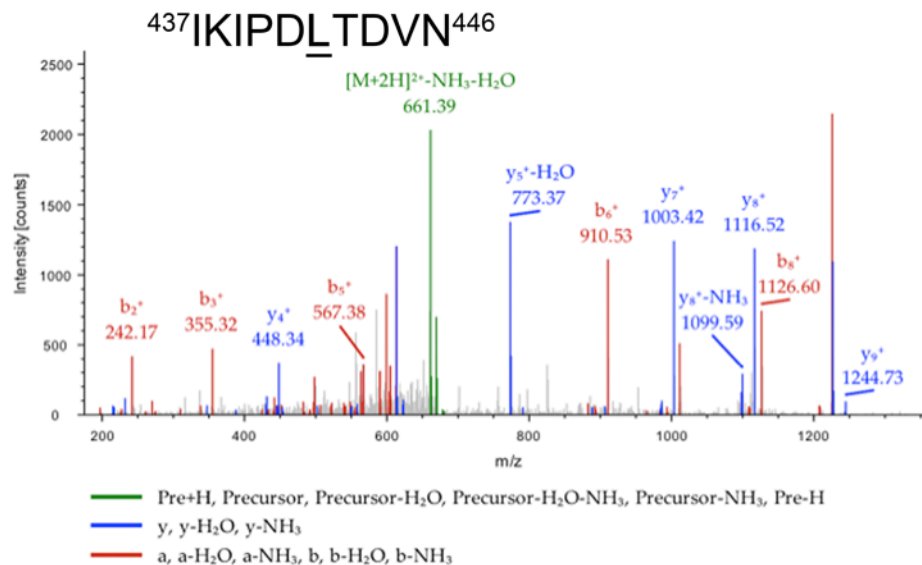

| #1 | a <sup>+</sup>        | a <sup>2+</sup>      | b <sup>+</sup>        | b <sup>2+</sup>      | Seq.     | y <sup>+</sup>        | y <sup>2+</sup>      | #2 |
|----|-----------------------|----------------------|-----------------------|----------------------|----------|-----------------------|----------------------|----|
| 1  | 86.10                 | 43.55                | 114.09                | 57.55                | I        |                       |                      | 10 |
| 2  | 214.19                | 107.60               | <b><u>242.19</u></b>  | 121.60               | K        | <b><u>1244.54</u></b> | <b><u>622.78</u></b> | 9  |
| 3  | 327.28                | 164.14               | <b><u>355.27</u></b>  | 178.14               | I        | <b><u>1116.45</u></b> | <b><u>558.73</u></b> | 8  |
| 4  | <b><u>424.33</u></b>  | 212.67               | <b><u>452.32</u></b>  | <b><u>226.67</u></b> | P        | <b><u>1003.37</u></b> | <b><u>502.19</u></b> | 7  |
| 5  | <b><u>539.36</u></b>  | <b><u>270.18</u></b> | <b><u>567.35</u></b>  | 284.18               | D        | <b><u>906.31</u></b>  | <b><u>453.66</u></b> | 6  |
| 6  | <b><u>882.44</u></b>  | <b><u>441.72</u></b> | <b><u>910.43</u></b>  | 455.72               | L-AziSev | <b><u>791.29</u></b>  | 396.15               | 5  |
| 7  | <b><u>983.48</u></b>  | <b><u>492.25</u></b> | <b><u>1011.48</u></b> | <b><u>506.24</u></b> | T        | <b><u>448.20</u></b>  | 224.61               | 4  |
| 8  | <b><u>1098.51</u></b> | <b><u>549.76</u></b> | <b><u>1126.51</u></b> | <b><u>563.76</u></b> | D        | <b><u>347.16</u></b>  | 174.08               | 3  |
| 9  | 1197.58               | <b><u>599.29</u></b> | <b><u>1225.58</u></b> | <b><u>613.29</u></b> | V        | <b><u>232.13</u></b>  | 116.57               | 2  |
| 10 |                       |                      |                       |                      | N        | 133.06                | 67.03                | 1  |

Fig S22. Identification of aziseovflurane adduct within the  $\beta_3$  subunit of FLAG- $\alpha_1\beta_3$  GABA<sub>A</sub> receptors photolabeled in the presence of 30  $\mu$ M aziseovflurane. Mass spectrum and corresponding peptide fragment table of aziisovflurane peptide containing  $\beta_3$ -L442 adduct. Residue modified by photolabel derivative is in bold and underlined. Detected identified ions are colored and labeled accordingly. Residues detected with a modification are noted.

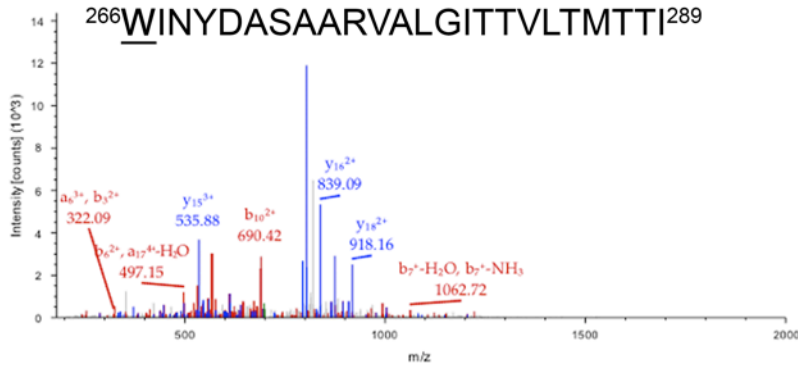

— Pre+H, Precursor, Precursor-H<sub>2</sub>O, Precursor-H<sub>2</sub>O-NH<sub>3</sub>, Precursor-NH<sub>3</sub>, Pre-H  
— y, y-H<sub>2</sub>O, y-NH<sub>3</sub>  
— a, a-H<sub>2</sub>O, a-NH<sub>3</sub>, b, b-H<sub>2</sub>O, b-NH<sub>3</sub>

| #1 | a <sup>+</sup> | a <sup>2+</sup> | a <sup>3+</sup> | a <sup>4+</sup> | b <sup>+</sup> | b <sup>2+</sup> | b <sup>3+</sup> | b <sup>4+</sup> | Seq.        | y <sup>+</sup> | y <sup>2+</sup> | y <sup>3+</sup> | y <sup>4+</sup> | #2 |
|----|----------------|-----------------|-----------------|-----------------|----------------|-----------------|-----------------|-----------------|-------------|----------------|-----------------|-----------------|-----------------|----|
| 1  | 389.09         | 195.05          | 130.37          | 98.03           | 417.08         | 209.05          | 139.70          | 105.03          | W-AziSev    |                |                 |                 |                 | 24 |
| 2  | 502.17         | <b>251.59</b>   | 168.06          | 126.30          | <b>530.17</b>  | 265.59          | 177.39          | 133.30          | I           | 2411           | <b>1206</b>     | <b>804</b>      | <b>604</b>      | 23 |
| 3  | <b>616.22</b>  | 308.61          | 206.08          | 154.81          | <b>644.21</b>  | <b>322.61</b>   | 215.41          | 161.81          | N           | 2298           | 1150            | 767             | 575             | 22 |
| 4  | <b>779.28</b>  | 390.14          | 260.43          | 195.58          | <b>807.27</b>  | <b>404.14</b>   | 269.76          | 202.57          | Y           | 2184           | 1093            | 729             | <b>547</b>      | 21 |
| 5  | <b>894.31</b>  | <b>447.66</b>   | 298.77          | 224.33          | <b>922.30</b>  | <b>461.65</b>   | 308.11          | 231.33          | D           | 2021           | 1011            | <b>674</b>      | <b>506</b>      | 20 |
| 6  | <b>965.34</b>  | 483.18          | <b>322.45</b>   | 242.09          | <b>993.34</b>  | <b>497.17</b>   | 331.78          | 249.09          | A           | 1906           | <b>954</b>      | <b>636</b>      | 477             | 19 |
| 7  | 1052.38        | <b>526.69</b>   | <b>351.46</b>   | 263.85          | 1080.37        | <b>540.69</b>   | 360.80          | 270.85          | S           | 1835           | <b>918</b>      | <b>612</b>      | 460             | 18 |
| 8  | <b>1123.41</b> | <b>562.21</b>   | 375.14          | 281.61          | <b>1151.41</b> | <b>576.21</b>   | 384.47          | <b>288.61</b>   | A           | 1748           | <b>875</b>      | 583             | 438             | 17 |
| 9  | 1194.45        | <b>597.73</b>   | 398.82          | 299.37          | <b>1222.45</b> | <b>611.73</b>   | <b>408.15</b>   | <b>306.37</b>   | A           | 1677           | <b>839</b>      | <b>560</b>      | 420             | 16 |
| 10 | 1350.55        | <b>675.78</b>   | 450.86          | 338.39          | 1378.55        | <b>689.78</b>   | 460.19          | 345.39          | R           | 1606           | <b>803</b>      | <b>536</b>      | 402             | 15 |
| 11 | 1449.62        | <b>725.31</b>   | 483.88          | 363.16          | 1477.61        | 739.31          | <b>493.21</b>   | 370.16          | V           | 1450           | <b>725</b>      | 484             | 363             | 14 |
| 12 | 1520.66        | 760.83          | <b>507.56</b>   | <b>380.92</b>   | 1548.65        | <b>774.83</b>   | <b>516.89</b>   | 387.92          | A           | 1351           | <b>676</b>      | 451             | <b>338</b>      | 13 |
| 13 | 1633.74        | 817.37          | <b>545.25</b>   | 409.19          | 1661.74        | <b>831.37</b>   | <b>554.58</b>   | 416.19          | L           | 1280           | <b>640</b>      | 427             | 321             | 12 |
| 14 | 1690.76        | <b>845.88</b>   | <b>564.26</b>   | <b>423.45</b>   | 1718.76        | 859.88          | 573.59          | 430.44          | G           | 1167           | <b>584</b>      | 390             | 292             | 11 |
| 15 | 1803.85        | 902.43          | <b>601.95</b>   | 451.72          | 1831.84        | <b>916.42</b>   | <b>611.29</b>   | 458.72          | I           | 1110           | <b>555</b>      | <b>371</b>      | 278             | 10 |
| 16 | 1904.89        | <b>952.95</b>   | <b>635.64</b>   | 476.98          | 1932.89        | 966.95          | <b>644.97</b>   | 483.98          | T           | 997            | <b>499</b>      | <b>333</b>      | 250             | 9  |
| 17 | 2005.94        | <b>1003.47</b>  | <b>669.32</b>   | 502.24          | 2033.94        | <b>1017.47</b>  | <b>678.65</b>   | <b>509.24</b>   | T           | <b>895</b>     | <b>448</b>      | 299             | 225             | 8  |
| 18 | 2105.01        | 1053.01         | 702.34          | 527.01          | 2133.01        | 1067.01         | 711.67          | <b>534.01</b>   | V           | <b>794</b>     | 398             | 265             | 199             | 7  |
| 19 | 2218.09        | 1109.55         | 740.04          | <b>555.28</b>   | 2246.09        | 1123.55         | 749.37          | <b>562.28</b>   | L           | <b>695</b>     | <b>348</b>      | 232             | 175             | 6  |
| 20 | 2319.14        | 1160.07         | <b>773.72</b>   | <b>580.54</b>   | 2347.14        | 1174.07         | 783.05          | <b>587.54</b>   | T           | 582            | 292             | 195             | 146             | 5  |
| 21 | 2466.18        | 1233.59         | 822.73          | 617.30          | 2494.17        | 1247.59         | 832.06          | <b>624.30</b>   | M-Oxidation | <b>481</b>     | 241             | 161             | 121             | 4  |
| 22 | 2567.23        | 1284.12         | <b>856.41</b>   | <b>642.56</b>   | 2595.22        | 1298.11         | <b>865.74</b>   | 649.56          | T           | <b>334</b>     | 168             | 112             | 84              | 3  |
| 23 | 2668.27        | 1334.64         | <b>890.10</b>   | <b>667.82</b>   | 2696.27        | 1348.64         | 899.43          | <b>674.82</b>   | T           | 233            | 117             | 78              | 59              | 2  |
| 24 |                |                 |                 |                 |                |                 |                 |                 | I           | 132            | 67              | 45              | 34              | 1  |

Fig S23. Identification of azisevoflurane adduct within the  $\beta_3$  subunit of FLAG- $\alpha_1\beta_3$  GABA<sub>A</sub> receptors photolabeled in the presence of 30  $\mu$ M azisevoflurane. Mass spectrum and corresponding peptide fragment table of aziisoflurane peptide containing  $\beta_3$ -W226 adduct. Residue modified by photolabel derivative is in bold and underlined. Detected identified ions are colored and labeled accordingly. Residues detected with a modification are noted.



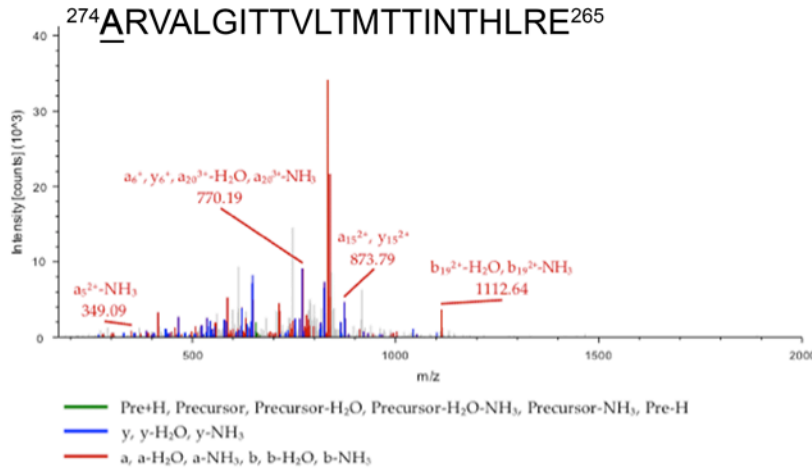

| #1 | a <sup>+</sup> | a <sup>2+</sup> | a <sup>3+</sup> | a <sup>4+</sup> | b <sup>+</sup> | b <sup>2+</sup> | b <sup>3+</sup> | b <sup>4+</sup> | Seq.         | y <sup>+</sup> | y <sup>2+</sup> | y <sup>3+</sup> | y <sup>4+</sup> | #2 |
|----|----------------|-----------------|-----------------|-----------------|----------------|-----------------|-----------------|-----------------|--------------|----------------|-----------------|-----------------|-----------------|----|
| 1  | 274.05         | 137.53          | 92.02           | 69.27           | <b>302.04</b>  | 151.52          | 101.35          | 76.27           | A-AziSev     |                |                 |                 |                 | 22 |
| 2  | 430.15         | 215.58          | 144.05          | 108.29          | 458.14         | 229.58          | 153.39          | 115.29          | R            | 2357.29        | 1179.15         | <b>786.43</b>   | <b>590.08</b>   | 21 |
| 3  | 529.22         | 265.11          | 177.08          | 133.06          | <b>557.21</b>  | <b>279.11</b>   | 186.41          | 140.06          | V            | 2201.18        | <b>1101.10</b>  | <b>734.40</b>   | <b>551.05</b>   | 20 |
| 4  | <b>600.25</b>  | <b>300.63</b>   | 200.76          | 150.82          | <b>628.25</b>  | 314.63          | 210.09          | 157.82          | A            | 2102.12        | <b>1051.56</b>  | 701.38          | <b>526.28</b>   | 19 |
| 5  | <b>713.34</b>  | <b>357.17</b>   | 238.45          | 179.09          | <b>741.33</b>  | 371.17          | 247.78          | 186.09          | L            | 2031.08        | 1016.04         | 677.70          | <b>508.53</b>   | 18 |
| 6  | <b>770.36</b>  | <b>385.68</b>   | 257.46          | 193.35          | <b>798.35</b>  | <b>399.68</b>   | 266.79          | 200.34          | G            | 1918.00        | <b>959.50</b>   | 640.00          | <b>480.25</b>   | 17 |
| 7  | <b>883.44</b>  | 442.23          | 295.15          | 221.62          | <b>911.44</b>  | <b>456.22</b>   | 304.48          | 228.62          | I            | 1860.97        | <b>930.99</b>   | <b>621.00</b>   | <b>466.00</b>   | 16 |
| 8  | 984.49         | <b>492.75</b>   | 328.84          | 246.88          | 1012.49        | <b>506.75</b>   | 338.17          | 253.88          | T            | 1747.89        | <b>874.45</b>   | <b>583.30</b>   | 437.73          | 15 |
| 9  | 1085.54        | <b>543.27</b>   | 362.52          | 272.14          | <b>1113.53</b> | <b>557.27</b>   | <b>371.85</b>   | <b>279.14</b>   | T            | 1646.84        | <b>823.92</b>   | <b>549.62</b>   | 412.47          | 14 |
| 10 | 1184.61        | <b>592.81</b>   | 395.54          | 296.91          | 1212.60        | <b>606.80</b>   | <b>404.87</b>   | 303.91          | V            | 1545.79        | <b>773.40</b>   | 515.94          | 387.20          | 13 |
| 11 | 1297.69        | <b>649.35</b>   | <b>433.24</b>   | 325.18          | 1325.69        | 663.35          | <b>442.57</b>   | 332.18          | L            | 1446.73        | 723.87          | <b>482.91</b>   | 362.44          | 12 |
| 12 | 1398.74        | <b>699.87</b>   | <b>466.92</b>   | 350.44          | 1426.73        | <b>713.87</b>   | 476.25          | <b>357.44</b>   | T            | 1333.64        | 667.32          | 445.22          | 334.17          | 11 |
| 13 | 1545.77        | <b>773.39</b>   | 515.93          | 387.20          | 1573.77        | <b>787.39</b>   | <b>525.26</b>   | 394.20          | M-Oxidation  | 1232.59        | 616.80          | 411.54          | 308.90          | 10 |
| 14 | 1646.82        | <b>823.91</b>   | <b>549.61</b>   | 412.46          | 1674.82        | <b>837.91</b>   | 558.94          | 419.46          | T            | 1085.56        | <b>543.28</b>   | 362.52          | 272.15          | 9  |
| 15 | 1747.87        | <b>874.44</b>   | <b>583.29</b>   | 437.72          | 1775.86        | 888.44          | <b>592.63</b>   | 444.72          | T            | 984.51         | <b>492.76</b>   | 328.84          | 246.88          | 8  |
| 16 | 1860.95        | <b>930.98</b>   | <b>620.99</b>   | <b>465.99</b>   | 1888.95        | <b>944.98</b>   | <b>630.32</b>   | <b>472.99</b>   | I            | <b>883.46</b>  | <b>442.24</b>   | 295.16          | 221.62          | 7  |
| 17 | 1975.98        | <b>988.49</b>   | <b>659.33</b>   | 494.75          | 2003.98        | <b>1002.49</b>  | 668.66          | 501.75          | N-Deamidated | <b>770.38</b>  | <b>385.69</b>   | 257.46          | 193.35          | 6  |
| 18 | 2077.03        | 1039.02         | 693.01          | <b>520.01</b>   | 2105.02        | <b>1053.02</b>  | 702.35          | <b>527.01</b>   | T            | <b>655.35</b>  | 328.18          | 219.12          | 164.59          | 5  |
| 19 | 2214.09        | 1107.55         | <b>738.70</b>   | <b>554.28</b>   | 2242.08        | 1121.54         | <b>748.03</b>   | 561.28          | H            | <b>554.30</b>  | 277.66          | 185.44          | 139.33          | 4  |
| 20 | 2327.17        | 1164.09         | <b>776.40</b>   | <b>582.55</b>   | 2355.17        | 1178.09         | <b>785.73</b>   | <b>589.55</b>   | L            | 417.25         | 209.13          | 139.75          | 105.07          | 3  |
| 21 | 2483.27        | 1242.14         | <b>828.43</b>   | <b>621.57</b>   | 2511.27        | 1256.14         | <b>837.76</b>   | <b>628.57</b>   | R            | 304.16         | 152.58          | 102.06          | 76.80           | 2  |
| 22 |                |                 |                 |                 |                |                 |                 |                 | E            | 148.06         | 74.53           | 50.03           | 37.77           | 1  |

Fig S24. Identification of aziseovflurane adduct within the  $\beta_3$  subunit of FLAG- $\alpha_1\beta_3$  GABA<sub>A</sub> receptors photolabeled in the presence of 30  $\mu$ M aziseovflurane. Mass spectrum and corresponding peptide fragment table of aziisovflurane peptide containing  $\beta_3$ -A274 adduct. Residue modified by photolabel derivative is in bold and underlined. Detected identified ions are colored and labeled accordingly. Residues detected with a modification are noted.

276 SQVSWFLNRESVPARTVFGVTTVL 299

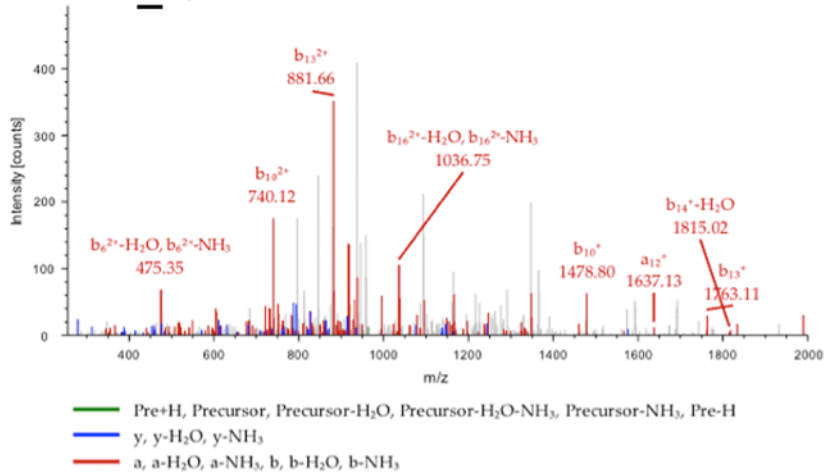

| #1 | a <sup>+</sup> | a <sup>2+</sup> | a <sup>3+</sup> | b <sup>+</sup> | b <sup>2+</sup> | b <sup>3+</sup> | Seq.         | y <sup>+</sup> | y <sup>2+</sup> | y <sup>3+</sup> | #2 |
|----|----------------|-----------------|-----------------|----------------|-----------------|-----------------|--------------|----------------|-----------------|-----------------|----|
| 1  | 290.04         | 145.52          | 97.35           | 318.04         | 159.52          | 106.68          | S-AziSe      |                |                 |                 | 24 |
| 2  | 419.08         | 210.05          | 140.37          | 447.08         | 224.04          | 149.70          | Q-Deamidated | 2608.38        | 1304.69         | 870.13          | 23 |
| 3  | 518.15         | 259.58          | 173.39          | 546.15         | 273.58          | 182.72          | V            | 2479.33        | 1240.17         | 827.12          | 22 |
| 4  | 605.19         | 303.10          | 202.40          | 633.18         | 317.09          | 211.73          | S            | 2380.27        | 1190.64         | 794.09          | 21 |
| 5  | 752.25         | 376.63          | 251.42          | 780.25         | 390.63          | 260.75          | F            | 2293.23        | 1147.12         | 765.08          | 20 |
| 6  | 938.33         | 469.67          | 313.45          | 966.33         | 483.67          | 322.78          | W            | 2146.17        | 1073.59         | 716.06          | 19 |
| 7  | 1051.42        | 526.21          | 351.14          | 1079.41        | 540.21          | 360.48          | L            | 1960.09        | 980.55          | 654.03          | 18 |
| 8  | 1166.44        | 583.73          | 389.49          | 1194.44        | 597.72          | 398.82          | N-Deamidated | 1847.00        | 924.00          | 616.34          | 17 |
| 9  | 1322.55        | 661.78          | 441.52          | 1350.54        | 675.77          | 450.85          | R            | 1731.98        | 866.49          | 578.00          | 16 |
| 10 | 1451.59        | 726.30          | 484.53          | 1479.58        | 740.29          | 493.87          | E            | 1575.87        | 788.44          | 525.96          | 15 |
| 11 | 1538.62        | 769.81          | 513.54          | 1566.61        | 783.81          | 522.88          | S            | 1446.83        | 723.92          | 482.95          | 14 |
| 12 | 1637.69        | 819.35          | 546.57          | 1665.68        | 833.35          | 555.90          | V            | 1359.80        | 680.40          | 453.94          | 13 |
| 13 | 1734.74        | 867.87          | 578.92          | 1762.74        | 881.87          | 588.25          | P            | 1260.73        | 630.87          | 420.92          | 12 |
| 14 | 1805.78        | 903.39          | 602.60          | 1833.77        | 917.39          | 611.93          | A            | 1163.68        | 582.34          | 388.56          | 11 |
| 15 | 1961.88        | 981.44          | 654.63          | 1989.87        | 995.44          | 663.96          | R            | 1092.64        | 546.82          | 364.89          | 10 |
| 16 | 2062.93        | 1031.97         | 688.31          | 2090.92        | 1045.96         | 697.65          | T            | 936.54         | 468.77          | 312.85          | 9  |
| 17 | 2162.00        | 1081.50         | 721.34          | 2189.99        | 1095.50         | 730.67          | V            | 835.49         | 418.25          | 279.17          | 8  |
| 18 | 2309.06        | 1155.04         | 770.36          | 2337.06        | 1169.03         | 779.69          | F            | 736.42         | 368.72          | 246.15          | 7  |
| 19 | 2366.09        | 1183.55         | 789.37          | 2394.08        | 1197.54         | 798.70          | G            | 589.36         | 295.18          | 197.12          | 6  |
| 20 | 2465.15        | 1233.08         | 822.39          | 2493.15        | 1247.08         | 831.72          | V            | 532.33         | 266.67          | 178.12          | 5  |
| 21 | 2566.20        | 1283.60         | 856.07          | 2594.20        | 1297.60         | 865.40          | T            | 433.27         | 217.14          | 145.09          | 4  |
| 22 | 2667.25        | 1334.13         | 889.75          | 2695.24        | 1348.13         | 899.09          | T            | 332.22         | 166.61          | 111.41          | 3  |
| 23 | 2766.32        | 1383.66         | 922.78          | 2794.31        | 1397.66         | 932.11          | V            | 231.17         | 116.09          | 77.73           | 2  |
| 24 |                |                 |                 |                |                 |                 | L            | 132.10         | 66.55           | 44.71           | 1  |

Appendix Fig S25. Identification of azisevoflurane adducts within the FLAG- $\alpha_1$  subunit of FLAG- $\alpha_1\beta_3\gamma_{2L}$ -L3-1D4 GABA<sub>A</sub> receptors photolabeled in the presence of 30  $\mu$ M azisevoflurane. Mass spectrum and corresponding peptide fragment table of peptides containing azisevoflurane  $\alpha_1$ -S276 adduct. Residue modified by photolabel derivative is in bold and underlined. Detected identified ions are colored and labeled accordingly. Residues detected with a modification are noted.



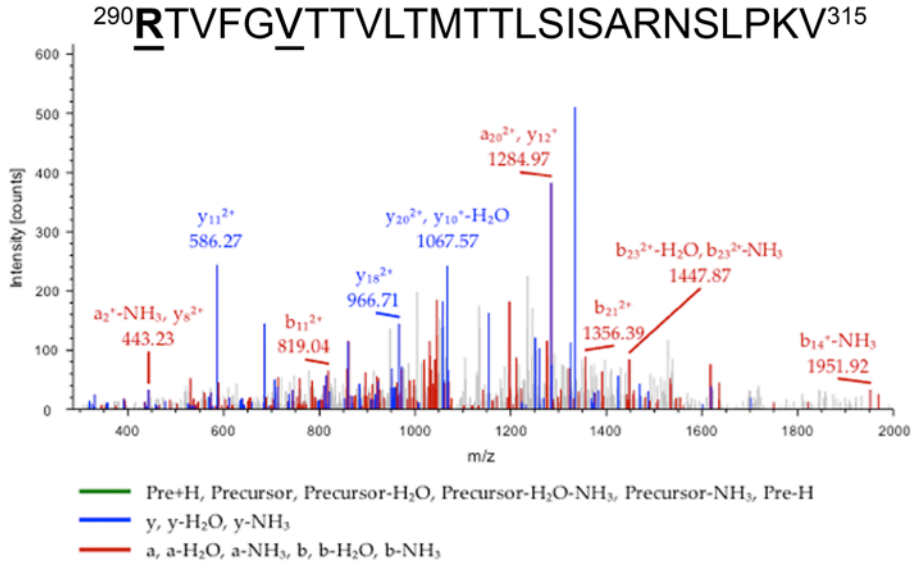

| #1 | a*      | a <sup>2+</sup> | a <sup>3+</sup> | b*      | b <sup>2+</sup> | b <sup>3+</sup> | Seq.         | y*      | y <sup>2+</sup> | y <sup>3+</sup> | #2 |
|----|---------|-----------------|-----------------|---------|-----------------|-----------------|--------------|---------|-----------------|-----------------|----|
| 1  | 359.11  | 180.06          | 120.38          | 387.11  | 194.06          | 129.71          | R-AziSev     |         |                 |                 | 26 |
| 2  | 460.16  | 230.58          | 154.06          | 488.15  | 244.58          | 163.39          | T            | 2867.45 | 1434.23         | 956.49          | 25 |
| 3  | 559.23  | 280.12          | 187.08          | 587.22  | 294.11          | 196.41          | V            | 2766.40 | 1383.71         | 922.81          | 24 |
| 4  | 706.30  | 353.65          | 236.10          | 734.29  | 367.65          | 245.44          | F            | 2667.33 | 1334.17         | 889.78          | 23 |
| 5  | 763.32  | 382.16          | 255.11          | 791.31  | 396.16          | 264.44          | G            | 2520.27 | 1260.64         | 840.76          | 22 |
| 6  | 1092.38 | 546.70          | 364.80          | 1120.38 | 560.69          | 374.13          | V-AziSev     | 2463.25 | 1232.13         | 821.75          | 21 |
| 7  | 1193.43 | 597.22          | 398.48          | 1221.43 | 611.22          | 407.81          | T            | 2134.18 | 1067.59         | 712.06          | 20 |
| 8  | 1294.48 | 647.74          | 432.16          | 1322.47 | 661.74          | 441.50          | T            | 2033.13 | 1017.07         | 678.38          | 19 |
| 9  | 1393.55 | 697.28          | 465.19          | 1421.54 | 711.27          | 474.52          | V            | 1932.08 | 966.55          | 644.70          | 18 |
| 10 | 1506.63 | 753.82          | 502.88          | 1534.63 | 767.82          | 512.21          | L            | 1833.02 | 917.01          | 611.68          | 17 |
| 11 | 1607.68 | 804.34          | 536.56          | 1635.67 | 818.34          | 545.90          | T            | 1719.93 | 860.47          | 573.98          | 16 |
| 12 | 1738.72 | 869.86          | 580.24          | 1766.71 | 883.86          | 589.58          | M            | 1618.88 | 809.95          | 540.30          | 15 |
| 13 | 1839.77 | 920.39          | 613.93          | 1867.76 | 934.38          | 623.26          | T            | 1487.84 | 744.43          | 496.62          | 14 |
| 14 | 1940.81 | 970.91          | 647.61          | 1968.81 | 984.91          | 656.94          | T            | 1386.80 | 693.90          | 462.94          | 13 |
| 15 | 2053.90 | 1027.45         | 685.30          | 2081.89 | 1041.45         | 694.64          | L            | 1285.75 | 643.38          | 429.25          | 12 |
| 16 | 2140.93 | 1070.97         | 714.32          | 2168.93 | 1084.97         | 723.65          | S            | 1172.66 | 586.84          | 391.56          | 11 |
| 17 | 2254.02 | 1127.51         | 752.01          | 2282.01 | 1141.51         | 761.34          | I            | 1085.63 | 543.32          | 362.55          | 10 |
| 18 | 2341.05 | 1171.03         | 781.02          | 2369.04 | 1185.02         | 790.35          | S            | 972.55  | 486.78          | 324.85          | 9  |
| 19 | 2412.08 | 1206.55         | 804.70          | 2440.08 | 1220.54         | 814.03          | A            | 885.52  | 443.26          | 295.84          | 8  |
| 20 | 2568.19 | 1284.60         | 856.73          | 2596.18 | 1298.59         | 866.06          | R            | 814.48  | 407.74          | 272.16          | 7  |
| 21 | 2683.21 | 1342.11         | 895.08          | 2711.21 | 1356.11         | 904.41          | N-Deamidated | 658.38  | 329.69          | 220.13          | 6  |
| 22 | 2770.24 | 1385.63         | 924.09          | 2798.24 | 1399.62         | 933.42          | S            | 543.35  | 272.18          | 181.79          | 5  |
| 23 | 2883.33 | 1442.17         | 961.78          | 2911.32 | 1456.17         | 971.11          | L            | 456.32  | 228.66          | 152.78          | 4  |
| 24 | 2980.38 | 1490.69         | 994.13          | 3008.38 | 1504.69         | 1003.46         | P            | 343.23  | 172.12          | 115.08          | 3  |
| 25 | 3108.48 | 1554.74         | 1036.83         | 3136.47 | 1568.74         | 1046.16         | K            | 246.18  | 123.59          | 82.73           | 2  |
| 26 |         |                 |                 |         |                 |                 | V            | 118.09  | 59.55           | 40.03           | 1  |

Appendix Fig S26. Identification of azisevoflurane adducts within the FLAG- $\alpha_1$  subunit of FLAG- $\alpha_1\beta_3\gamma_{2L}$ -L3-1D4 GABA<sub>A</sub> receptors photolabeled in the presence of 30  $\mu$ M azisevoflurane. Mass spectrum and corresponding peptide fragment table of peptides containing azisevoflurane  $\alpha_1$ -R290/  $\alpha_1$ -V295 adduct. Residue modified by photolabel derivative is in bold and underlined.

Detected identified ions are colored and labeled accordingly. Residues detected with a modification are noted.

<sup>292</sup>VFGVTTVLTMTTLLSISARN<sup>310</sup>

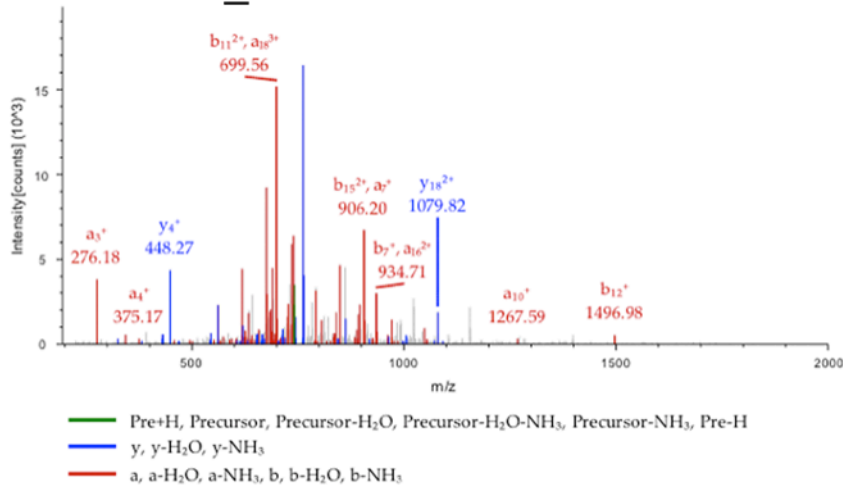

| #1 | a*             | a <sup>2+</sup> | a <sup>3+</sup> | b*             | b <sup>2+</sup> | b <sup>3+</sup> | Seq.         | y*            | y <sup>2+</sup> | y <sup>3+</sup> | #2 |
|----|----------------|-----------------|-----------------|----------------|-----------------|-----------------|--------------|---------------|-----------------|-----------------|----|
| 1  | 72.08          | 36.54           | 24.70           | 100.08         | 50.54           | 34.03           | V            |               |                 |                 | 19 |
| 2  | 219.15         | 110.08          | 73.72           | 247.14         | 124.08          | 83.05           | F            | 2159.00       | <b>1080.00</b>  | <b>720.34</b>   | 18 |
| 3  | <b>276.17</b>  | 138.59          | 92.73           | 304.17         | 152.59          | 102.06          | G            | 2011.93       | <b>1006.47</b>  | <b>671.31</b>   | 17 |
| 4  | <b>375.24</b>  | 188.12          | 125.75          | 403.23         | 202.12          | 135.08          | V            | 1954.91       | 977.96          | <b>652.31</b>   | 16 |
| 5  | 706.28         | 353.65          | 236.10          | <b>734.28</b>  | 367.64          | 245.43          | T-AziSev     | 1855.84       | 928.42          | <b>619.28</b>   | 15 |
| 6  | 807.33         | 404.17          | 269.78          | <b>835.33</b>  | 418.17          | 279.11          | T            | 1524.79       | <b>762.90</b>   | 508.94          | 14 |
| 7  | <b>906.40</b>  | 453.70          | 302.81          | <b>934.40</b>  | 467.70          | 312.14          | V            | 1423.75       | <b>712.38</b>   | 475.25          | 13 |
| 8  | 1019.48        | 510.25          | 340.50          | <b>1047.48</b> | 524.24          | 349.83          | L            | 1324.68       | <b>662.84</b>   | 442.23          | 12 |
| 9  | 1120.53        | <b>560.77</b>   | 374.18          | 1148.53        | <b>574.77</b>   | 383.51          | T            | 1211.59       | <b>606.30</b>   | 404.54          | 11 |
| 10 | <b>1267.57</b> | <b>634.29</b>   | 423.19          | 1295.56        | 648.29          | <b>432.53</b>   | M-Oxidation  | 1110.55       | 555.78          | 370.85          | 10 |
| 11 | 1368.62        | <b>684.81</b>   | 456.88          | 1396.61        | <b>698.81</b>   | 466.21          | T            | <b>963.51</b> | 482.26          | 321.84          | 9  |
| 12 | 1469.66        | <b>735.34</b>   | 490.56          | <b>1497.66</b> | 749.33          | <b>499.89</b>   | T            | <b>862.46</b> | <b>431.74</b>   | 288.16          | 8  |
| 13 | 1582.75        | <b>791.88</b>   | 528.25          | 1610.74        | <b>805.87</b>   | 537.59          | L            | <b>761.42</b> | <b>381.21</b>   | 254.48          | 7  |
| 14 | 1669.78        | <b>835.39</b>   | 557.26          | 1697.77        | <b>849.39</b>   | <b>566.60</b>   | S            | 648.33        | <b>324.67</b>   | 216.78          | 6  |
| 15 | 1782.86        | <b>891.94</b>   | <b>594.96</b>   | 1810.86        | <b>905.93</b>   | <b>604.29</b>   | I            | <b>561.30</b> | 281.15          | 187.77          | 5  |
| 16 | 1869.90        | <b>935.45</b>   | <b>623.97</b>   | 1897.89        | 949.45          | <b>633.30</b>   | S            | <b>448.22</b> | 224.61          | 150.08          | 4  |
| 17 | 1940.93        | <b>970.97</b>   | <b>647.65</b>   | 1968.93        | <b>984.97</b>   | <b>656.98</b>   | A            | 361.18        | 181.10          | 121.07          | 3  |
| 18 | 2097.03        | 1049.02         | <b>699.68</b>   | 2125.03        | 1063.02         | <b>709.01</b>   | R            | 290.15        | 145.58          | 97.39           | 2  |
| 19 |                |                 |                 |                |                 |                 | N-Deamidated | 134.04        | 67.53           | 45.35           | 1  |

Appendix Fig S27. Identification of azisevoflurane adducts within the FLAG- $\alpha_1$  subunit of FLAG- $\alpha_1\beta_3\gamma_{2L}$ -L3-1D4 GABA<sub>A</sub> receptors photolabeled in the presence of 30  $\mu$ M azisevoflurane. Mass spectrum and corresponding peptide fragment table of peptides containing azisevoflurane - T296 adduct. Residue modified by photolabel derivative is in bold and underlined. Detected identified ions are colored and labeled accordingly. Residues detected with a modification are noted.

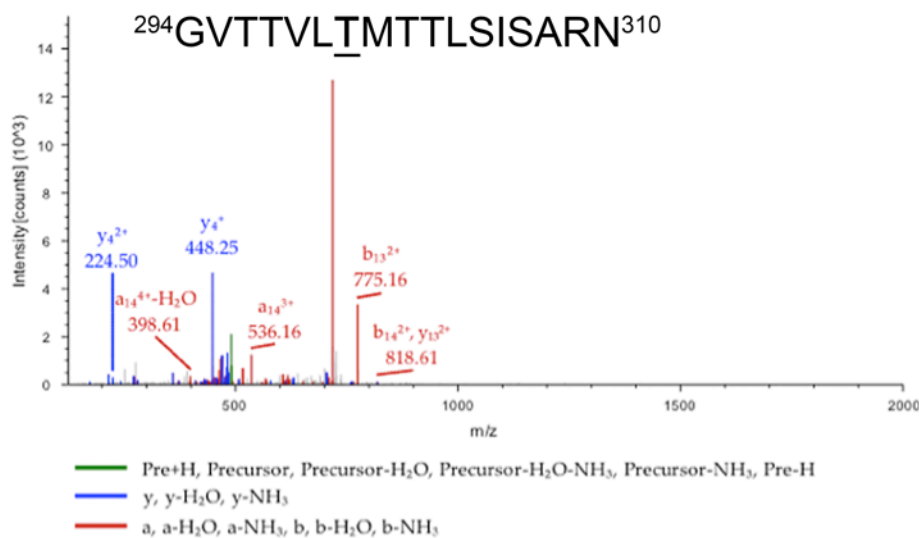

| #1 | a*            | a <sup>2+</sup> | a <sup>3+</sup> | a <sup>4+</sup> | b*            | b <sup>2+</sup> | b <sup>3+</sup> | b <sup>4+</sup> | Seq.         | y*            | y <sup>2+</sup> | y <sup>3+</sup> | y <sup>4+</sup> | #2 |
|----|---------------|-----------------|-----------------|-----------------|---------------|-----------------|-----------------|-----------------|--------------|---------------|-----------------|-----------------|-----------------|----|
| 1  | 30.03         | 15.52           | 10.68           | 8.26            | 58.03         | 29.52           | 20.01           | 15.26           | G            |               |                 |                 |                 | 17 |
| 2  | 129.10        | 65.05           | 43.71           | 33.03           | 157.10        | 79.05           | 53.04           | 40.03           | V            | 1938.91       | 969.96          | 646.98          | <b>485.48</b>   | 16 |
| 3  | 230.15        | 115.58          | 77.39           | 58.29           | 258.14        | 129.58          | 86.72           | 65.29           | T            | 1839.84       | 920.43          | <b>613.95</b>   | <b>460.72</b>   | 15 |
| 4  | 331.20        | 166.10          | 111.07          | 83.55           | <b>359.19</b> | 180.10          | 120.40          | 90.55           | T            | 1738.80       | 869.90          | <b>580.27</b>   | <b>435.45</b>   | 14 |
| 5  | <b>430.27</b> | <b>215.64</b>   | 144.09          | 108.32          | <b>458.26</b> | 229.63          | 153.43          | 115.32          | V            | 1637.75       | <b>819.38</b>   | 546.59          | <b>410.19</b>   | 13 |
| 6  | 543.35        | <b>272.18</b>   | 181.79          | 136.59          | 571.35        | 286.18          | 191.12          | 143.59          | L            | 1538.68       | 769.84          | 513.57          | 385.43          | 12 |
| 7  | 874.40        | <b>437.70</b>   | 292.14          | 219.35          | 902.39        | 451.70          | 301.47          | 226.35          | T-AziSev     | 1425.60       | 713.30          | <b>475.87</b>   | 357.15          | 11 |
| 8  | 1005.44       | 503.22          | 335.82          | 252.11          | 1033.43       | <b>517.22</b>   | 345.15          | 259.11          | M            | 1094.55       | 547.78          | 365.52          | 274.39          | 10 |
| 9  | 1106.48       | 553.75          | 369.50          | 277.38          | 1134.48       | <b>567.74</b>   | 378.83          | 284.38          | T            | 963.51        | <b>482.26</b>   | 321.84          | <b>241.63</b>   | 9  |
| 10 | 1207.53       | 604.27          | 403.18          | 302.64          | 1235.53       | <b>618.27</b>   | <b>412.51</b>   | 309.64          | T            | 862.46        | <b>431.74</b>   | 288.16          | <b>216.37</b>   | 8  |
| 11 | 1320.62       | 660.81          | <b>440.88</b>   | 330.91          | 1348.61       | <b>674.81</b>   | <b>450.21</b>   | 337.91          | L            | <b>761.42</b> | 381.21          | 254.48          | 191.11          | 7  |
| 12 | 1407.65       | <b>704.33</b>   | <b>469.89</b>   | 352.67          | 1435.64       | <b>718.32</b>   | <b>479.22</b>   | <b>359.67</b>   | S            | 648.33        | 324.67          | 216.78          | 162.84          | 6  |
| 13 | 1520.73       | <b>760.87</b>   | <b>507.58</b>   | 380.94          | 1548.73       | <b>774.87</b>   | <b>516.91</b>   | 387.94          | I            | 561.30        | <b>281.15</b>   | 187.77          | 141.08          | 5  |
| 14 | 1607.76       | 804.39          | <b>536.59</b>   | 402.70          | 1635.76       | <b>818.38</b>   | 545.92          | <b>409.70</b>   | S            | <b>448.22</b> | <b>224.61</b>   | 150.08          | 112.81          | 4  |
| 15 | 1678.80       | 839.90          | 560.27          | 420.46          | 1706.80       | 853.90          | <b>569.60</b>   | <b>427.45</b>   | A            | 361.18        | 181.10          | 121.07          | 91.05           | 3  |
| 16 | 1834.90       | 917.95          | 612.31          | <b>459.48</b>   | 1862.90       | 931.95          | <b>621.64</b>   | <b>466.48</b>   | R            | 290.15        | 145.58          | 97.39           | 73.29           | 2  |
| 17 |               |                 |                 |                 |               |                 |                 |                 | N-Deamidated | 134.04        | 67.53           | 45.35           | 34.27           | 1  |

Appendix Fig S28. Identification of azisevoflurane adducts within the FLAG- $\alpha_1$  subunit of FLAG- $\alpha_1\beta_3\gamma_{2L}$ -L3-1D4 GABA<sub>A</sub> receptors photolabeled in the presence of 30  $\mu\text{M}$  azisevoflurane. Mass spectrum and corresponding peptide fragment table of peptides containing azisevoflurane  $\alpha_1$ -T300 adduct. Residue modified by photolabel derivative is in bold and underlined. Detected identified ions are colored and labeled accordingly. Residues detected with a modification are noted.

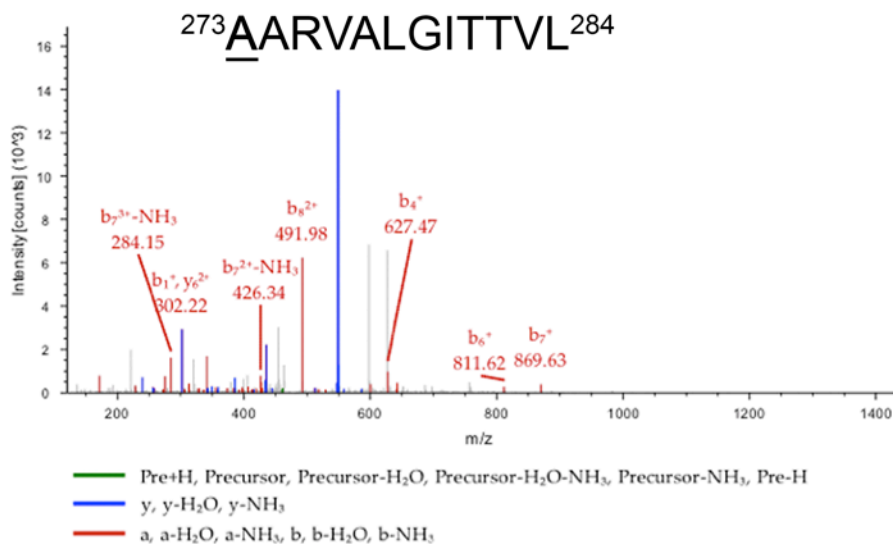

| #1 | a*            | a <sup>2+</sup> | a <sup>3+</sup> | b*            | b <sup>2+</sup> | b <sup>3+</sup> | Seq.     | y*            | y <sup>2+</sup> | y <sup>3+</sup> | #2 |
|----|---------------|-----------------|-----------------|---------------|-----------------|-----------------|----------|---------------|-----------------|-----------------|----|
| 1  | 274.05        | 137.53          | 92.02           | <b>302.04</b> | 151.52          | 101.35          | A-AziSev |               |                 |                 | 12 |
| 2  | 345.08        | 173.05          | 115.70          | <b>373.08</b> | 187.04          | 125.03          | A        | 1113.70       | <b>557.35</b>   | 371.90          | 11 |
| 3  | 501.19        | 251.10          | 167.73          | <b>529.18</b> | 265.09          | 177.06          | R        | 1042.66       | 521.83          | 348.23          | 10 |
| 4  | <b>600.25</b> | 300.63          | 200.76          | <b>628.25</b> | 314.63          | 210.09          | V        | 886.56        | <b>443.78</b>   | 296.19          | 9  |
| 5  | 671.29        | <b>336.15</b>   | 224.44          | 699.29        | <b>350.15</b>   | 233.77          | A        | 787.49        | 394.25          | 263.17          | 8  |
| 6  | 784.38        | <b>392.69</b>   | 262.13          | <b>812.37</b> | <b>406.69</b>   | <b>271.46</b>   | L        | 716.46        | <b>358.73</b>   | <b>239.49</b>   | 7  |
| 7  | 841.40        | 421.20          | 281.14          | <b>869.39</b> | <b>435.20</b>   | 290.47          | G        | 603.37        | <b>302.19</b>   | 201.80          | 6  |
| 8  | 954.48        | 477.74          | 318.83          | 982.48        | <b>491.74</b>   | <b>328.16</b>   | I        | <b>546.35</b> | 273.68          | 182.79          | 5  |
| 9  | 1055.53       | 528.27          | 352.51          | 1083.52       | 542.27          | 361.85          | T        | <b>433.27</b> | 217.14          | 145.09          | 4  |
| 10 | 1156.58       | 578.79          | <b>386.20</b>   | 1184.57       | 592.79          | 395.53          | T        | 332.22        | 166.61          | 111.41          | 3  |
| 11 | 1255.64       | 628.33          | <b>419.22</b>   | 1283.64       | <b>642.32</b>   | <b>428.55</b>   | V        | 231.17        | 116.09          | 77.73           | 2  |
| 12 |               |                 |                 |               |                 |                 | L        | 132.10        | 66.55           | 44.71           | 1  |

Fig S29. Identification of azisevoflurane adduct within the  $\beta_3$  subunits of FLAG- $\alpha_1\beta_3\gamma_{2L}$ -L3-1D4 GABA<sub>A</sub> receptors photolabeled in the presence of 30 $\mu$ M azisevoflurane. Mass spectrum and corresponding peptide fragment table of peptides containing azisevoflurane  $\alpha_1$ -A273 adduct within the  $\beta_3$  subunit. Residue modified by photolabel derivative is in bold and underlined.

Detected identified ions are colored and labeled accordingly. Residues detected with a modification are noted.

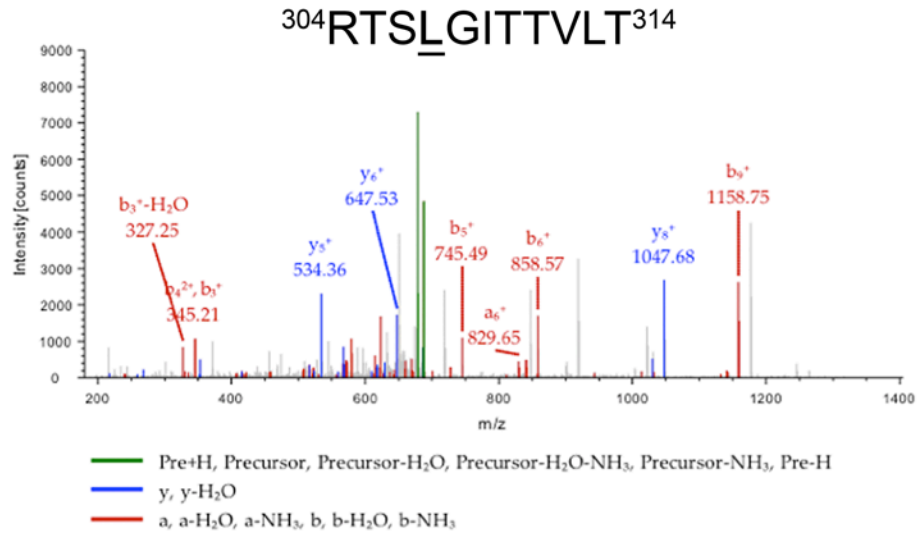

| #1 | a*      | a <sup>2+</sup> | b*      | b <sup>2+</sup> | Seq.     | y*      | y <sup>2+</sup> | #2 |
|----|---------|-----------------|---------|-----------------|----------|---------|-----------------|----|
| 1  | 129.11  | 65.06           | 157.11  | 79.06           | R        |         |                 | 11 |
| 2  | 230.16  | 115.58          | 258.16  | 129.58          | T        | 1235.58 | 618.29          | 10 |
| 3  | 317.19  | 159.10          | 345.19  | 173.10          | S        | 1134.53 | 567.77          | 9  |
| 4  | 660.28  | 330.64          | 688.27  | 344.64          | L-AziSev | 1047.50 | 524.25          | 8  |
| 5  | 717.30  | 359.15          | 745.29  | 373.15          | G        | 704.42  | 352.71          | 7  |
| 6  | 830.38  | 415.69          | 858.38  | 429.69          | I        | 647.40  | 324.20          | 6  |
| 7  | 931.43  | 466.22          | 959.42  | 480.22          | T        | 534.31  | 267.66          | 5  |
| 8  | 1032.48 | 516.74          | 1060.47 | 530.74          | T        | 433.27  | 217.14          | 4  |
| 9  | 1131.54 | 566.28          | 1159.54 | 580.27          | V        | 332.22  | 166.61          | 3  |
| 10 | 1244.63 | 622.82          | 1272.62 | 636.82          | L        | 233.15  | 117.08          | 2  |
| 11 |         |                 |         |                 | T        | 120.07  | 60.54           | 1  |

Fig S30. Identification of azisevoflurane adducts within the  $\gamma_{2L}$ -L3-1D4 subunits of FLAG- $\alpha_1\beta_3\gamma_{2L}$ -L3-1D4 GABA<sub>A</sub> receptors photolabeled in the presence of 30 $\mu$ M azisevoflurane. Mass spectrum and corresponding peptide fragment table of peptides containing azisevoflurane  $\gamma_{2L}$ -L307 adduct. Residue modified by photolabel derivative is in bold and underlined. Detected identified ions are colored and labeled accordingly. Residues detected with a modification are noted.



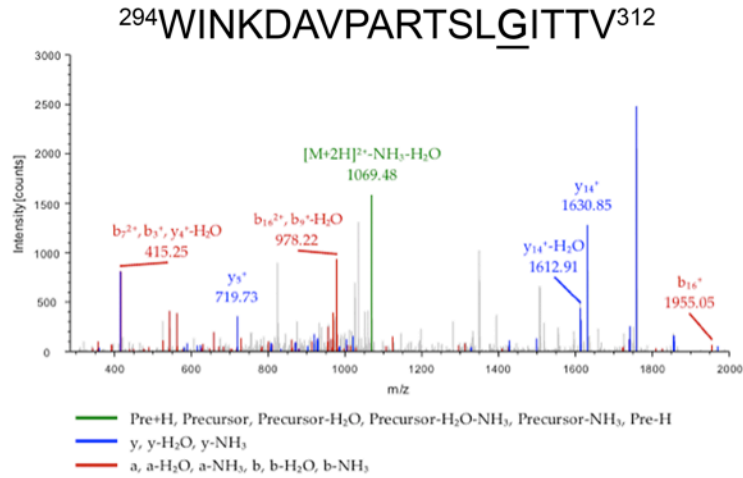

| #1 | a*             | a <sup>2+</sup> | b*             | b <sup>2+</sup> | Seq.         | y*             | y <sup>2+</sup> | #2 |
|----|----------------|-----------------|----------------|-----------------|--------------|----------------|-----------------|----|
| 1  | 159.09         | 80.05           | 187.09         | 94.05           | W            |                |                 | 18 |
| 2  | 272.18         | 136.59          | 300.17         | 150.59          | I            | 1986.98        | 993.99          | 17 |
| 3  | 387.20         | 194.10          | <u>415.20</u>  | 208.10          | N-Deamidated | 1873.89        | 937.45          | 16 |
| 4  | 515.30         | 258.15          | <u>543.29</u>  | 272.15          | K            | <u>1758.87</u> | <u>879.94</u>   | 15 |
| 5  | <u>630.32</u>  | 315.67          | <u>658.32</u>  | 329.66          | D            | <u>1630.77</u> | 815.89          | 14 |
| 6  | <u>701.36</u>  | 351.18          | <u>729.36</u>  | 365.18          | A            | 1515.75        | 758.38          | 13 |
| 7  | <u>800.43</u>  | 400.72          | 828.43         | <u>414.72</u>   | V            | 1444.71        | 722.86          | 12 |
| 8  | 897.48         | <u>449.25</u>   | 925.48         | 463.24          | P            | 1345.64        | 673.32          | 11 |
| 9  | <u>968.52</u>  | 484.76          | <u>996.51</u>  | 498.76          | A            | 1248.59        | <u>624.80</u>   | 10 |
| 10 | <u>1124.62</u> | <u>562.81</u>   | 1152.62        | <u>576.81</u>   | R            | 1177.55        | <u>589.28</u>   | 9  |
| 11 | 1225.67        | 613.34          | 1253.66        | <u>627.34</u>   | T            | <u>1021.45</u> | 511.23          | 8  |
| 12 | <u>1312.70</u> | 656.85          | 1340.70        | <u>670.85</u>   | S            | <u>920.40</u>  | 460.70          | 7  |
| 13 | <u>1425.78</u> | 713.40          | 1453.78        | 727.39          | L            | <u>833.37</u>  | 417.19          | 6  |
| 14 | 1712.80        | 856.91          | <u>1740.80</u> | <u>870.90</u>   | G-AziSev     | <u>720.28</u>  | <u>360.65</u>   | 5  |
| 15 | <u>1825.89</u> | <u>913.45</u>   | 1853.88        | <u>927.45</u>   | I            | 433.27         | 217.14          | 4  |
| 16 | 1926.94        | <u>963.97</u>   | <u>1954.93</u> | <u>977.97</u>   | T            | 320.18         | 160.59          | 3  |
| 17 | 2027.98        | <u>1014.50</u>  | 2055.98        | <u>1028.49</u>  | T            | 219.13         | 110.07          | 2  |
| 18 |                |                 |                |                 | V            | 118.09         | 59.55           | 1  |

Fig S31. Identification of azisevoflurane adducts within the  $\gamma_{2L}$ -L3-1D4 subunits of FLAG- $\alpha_1\beta_3\gamma_{2L}$ -L3-1D4 GABA<sub>A</sub> receptors photolabeled in the presence of 30 $\mu$ M azisevoflurane. Mass spectrum and corresponding peptide fragment table of peptides containing azisevoflurane  $\gamma_{2L}$ -G308 adduct within  $\gamma_{2L}$ -L3-1D4 subunit. Residue modified by photolabel derivative is in bold and underlined. Detected identified ions are colored and labeled accordingly. Residues detected with a modification are noted.

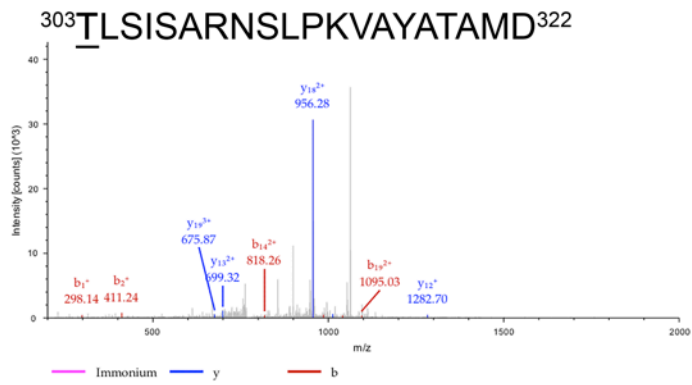

| #1 | Immonium | b <sup>+</sup> | b <sup>2+</sup> | b <sup>3+</sup> | Seq.         | y <sup>+</sup> | y <sup>2+</sup> | y <sup>3+</sup> | #2 |
|----|----------|----------------|-----------------|-----------------|--------------|----------------|-----------------|-----------------|----|
| 1  | 74.06    | <b>298.03</b>  | 149.52          | 100.01          | T-Azils      |                |                 |                 | 20 |
| 2  | 86.10    | <b>411.11</b>  | 206.06          | 137.71          | L            | 2025.03        | <b>1013.02</b>  | <b>675.68</b>   | 19 |
| 3  | 60.04    | 498.14         | 249.57          | 166.72          | S            | 1911.95        | <b>956.48</b>   | 637.99          | 18 |
| 4  | 86.10    | 611.23         | 306.12          | 204.41          | I            | 1824.92        | 912.96          | 608.98          | 17 |
| 5  | 60.04    | 698.26         | 349.63          | 233.42          | S            | 1711.83        | 856.42          | 571.28          | 16 |
| 6  | 44.05    | 769.30         | 385.15          | 257.10          | A            | 1624.80        | 812.90          | 542.27          | 15 |
| 7  | 129.11   | 925.40         | 463.20          | 309.14          | R            | 1553.76        | 777.39          | 518.59          | 14 |
| 8  | 87.06    | <b>1040.42</b> | 520.72          | 347.48          | N-Deamidated | 1397.66        | <b>699.33</b>   | 466.56          | 13 |
| 9  | 60.04    | 1127.46        | 564.23          | 376.49          | S            | <b>1282.63</b> | 641.82          | 428.22          | 12 |
| 10 | 86.10    | 1240.54        | 620.77          | 414.18          | L            | 1195.60        | 598.31          | 399.21          | 11 |
| 11 | 70.07    | 1337.59        | 669.30          | 446.54          | P            | 1082.52        | 541.76          | 361.51          | 10 |
| 12 | 101.11   | 1465.69        | 733.35          | 489.23          | K            | 985.47         | 493.24          | 329.16          | 9  |
| 13 | 72.08    | 1564.76        | 782.88          | 522.26          | V            | 857.37         | 429.19          | 286.46          | 8  |
| 14 | 44.05    | 1635.79        | <b>818.40</b>   | 545.94          | A            | 758.30         | 379.65          | 253.44          | 7  |
| 15 | 136.08   | 1798.86        | 899.93          | 600.29          | Y            | 687.27         | 344.14          | 229.76          | 6  |
| 16 | 44.05    | 1869.89        | 935.45          | 623.97          | A            | 524.20         | 262.60          | 175.41          | 5  |
| 17 | 74.06    | 1970.94        | <b>985.97</b>   | 657.65          | I            | 453.17         | 227.09          | 151.73          | 4  |
| 18 | 44.05    | 2041.98        | 1021.49         | 681.33          | A            | 352.12         | 176.56          | 118.04          | 3  |
| 19 | 104.05   | 2189.01        | <b>1095.01</b>  | 730.34          | M-Oxidation  | 281.08         | 141.04          | 94.36           | 2  |
| 20 |          |                |                 |                 | D            | 134.04         | 67.53           | 45.35           | 1  |

Fig S32. Identification of aziisoflurane adducts within the FLAG- $\alpha_1\beta_3\gamma_{2L}$ -L3-1D4 GABA<sub>A</sub> receptors photolabeled in the presence of 30 $\mu$ M aziisoflurane and 3mM isoflurane. Mass spectrum and corresponding peptide fragment table of peptides containing aziisoflurane  $\alpha_1$ -T303 adduct within the FLAG- $\alpha_1$  subunit (corresponding with  $\alpha_1$ -T268). Residue modified by photolabel derivative is in bold and underlined. Detected identified ions are colored and labeled accordingly. Residues detected with a modification are noted.

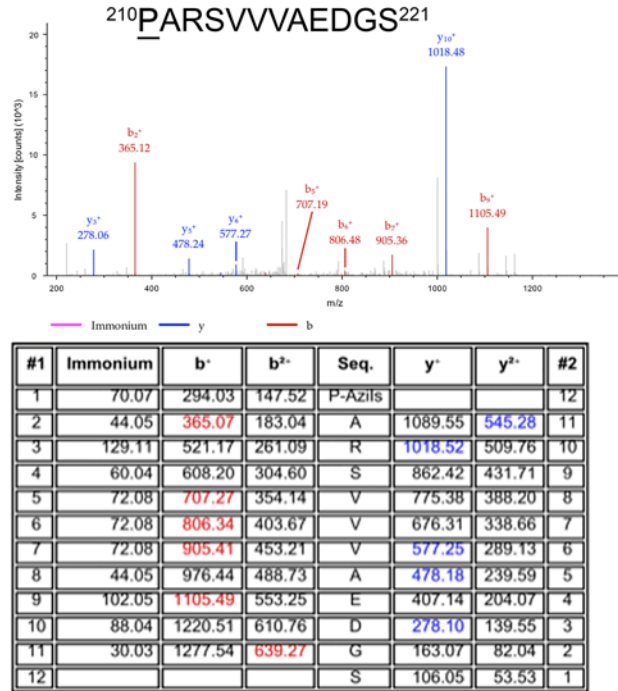

Fig S33. Identification of aziisoflurane adducts within the FLAG- $\alpha_1\beta_3\gamma_{2L}$ -L3-1D4 GABA<sub>A</sub> receptors photolabeled in the presence of 30 $\mu$ M aziisoflurane and 3mM isoflurane. Mass spectrum and corresponding peptide fragment table of peptides containing aziisoflurane  $\alpha_1$ -P210 adducts within the FLAG- $\alpha_1$  subunit (corresponding with  $\alpha_1$ -P170). Residue modified by photolabel derivative is in bold and underlined. Detected identified ions are colored and labeled accordingly. Residues detected with a modification are noted.



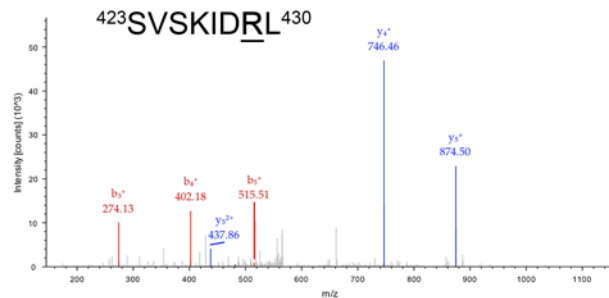

| #1 | Immonium | b <sup>+</sup> | b <sup>2+</sup> | Seq.     | y <sup>+</sup> | y <sup>2+</sup> | #2 |
|----|----------|----------------|-----------------|----------|----------------|-----------------|----|
| 1  | 60.04    | 88.04          | 44.52           | S        |                |                 | 8  |
| 2  | 72.08    | 187.11         | 94.06           | V        | 1060.51        | 530.76          | 7  |
| 3  | 60.04    | <b>274.14</b>  | 137.57          | S        | 961.44         | <b>481.22</b>   | 6  |
| 4  | 101.11   | <b>402.23</b>  | 201.62          | K        | <b>874.41</b>  | <b>437.71</b>   | 5  |
| 5  | 86.10    | <b>515.32</b>  | 258.16          | I        | <b>746.31</b>  | 373.66          | 4  |
| 6  | 88.04    | 630.35         | 315.68          | D        | 633.23         | 317.12          | 3  |
| 7  | 129.11   | 1016.44        | 508.73          | R-AziSev | 518.20         | 259.60          | 2  |
| 8  |          |                |                 | L        | 132.10         | 66.55           | 1  |

Fig S34. Identification of azisevoflurane adducts within the FLAG- $\alpha_1\beta_3\gamma_{2L}$ -L3-1D4 GABA<sub>A</sub> receptors photolabeled in the presence of 30 $\mu$ M azisevoflurane and 3mM sevoflurane respectively. Mass spectrum and corresponding peptide fragment table of peptides containing azisevoflurane  $\alpha_1$ -R429 adduct within the FLAG- $\alpha_1$  subunit (corresponding with  $\alpha_1$ -R429 in the  $\alpha_1$  subunit). Residue modified by photolabel derivative is in bold and underlined. Detected identified ions are colored and labeled accordingly. Residues detected with a modification are noted.

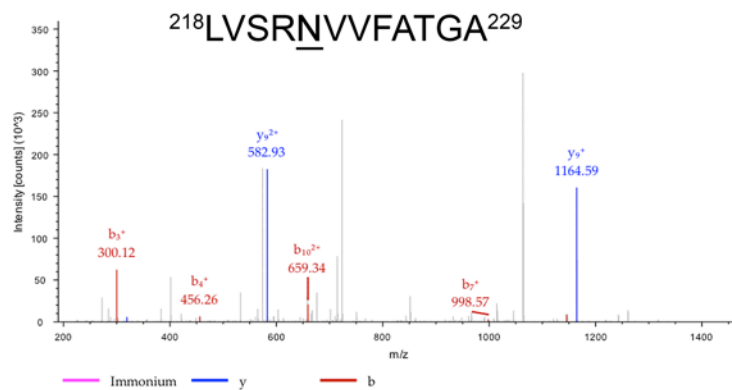

| #1 | Immonium | b <sup>+</sup> | b <sup>2+</sup> | Seq.     | y <sup>+</sup> | y <sup>2+</sup> | #2 |
|----|----------|----------------|-----------------|----------|----------------|-----------------|----|
| 1  | 86.10    | 114.09         | 57.55           | L        |                |                 | 12 |
| 2  | 72.08    | 213.16         | 107.08          | V        | 1350.61        | 675.81          | 11 |
| 3  | 60.04    | <b>300.19</b>  | 150.60          | S        | 1251.54        | 626.27          | 10 |
| 4  | 129.11   | <b>456.29</b>  | 228.65          | R        | <b>1164.51</b> | <b>582.76</b>   | 9  |
| 5  | 87.06    | 800.33         | 400.67          | N-AziSev | 1008.41        | 504.71          | 8  |
| 6  | 72.08    | 899.40         | 450.20          | V        | 664.37         | 332.69          | 7  |
| 7  | 72.08    | <b>998.47</b>  | 499.74          | V        | 565.30         | 283.15          | 6  |
| 8  | 120.08   | <b>1145.54</b> | 573.27          | F        | 466.23         | 233.62          | 5  |
| 9  | 44.05    | 1216.58        | 608.79          | A        | <b>319.16</b>  | 160.08          | 4  |
| 10 | 74.06    | 1317.62        | <b>659.32</b>   | T        | 248.12         | 124.57          | 3  |
| 11 | 30.03    | 1374.65        | 687.83          | G        | 147.08         | 74.04           | 2  |
| 12 |          |                |                 | A        | 90.05          | 45.53           | 1  |

Fig S35. Identification of azisevoflurane adducts within the FLAG- $\alpha_1\beta_3\gamma_{2L}$ -L3-1D4 GABA<sub>A</sub> receptors photolabeled in the presence of 30 $\mu$ M azisevoflurane and 3mM sevoflurane respectively. Mass spectrum and corresponding peptide fragment table of peptides containing azisevoflurane  $\beta_3$ -N222 adduct within the  $\beta_3$  subunit (corresponding with  $\beta_3$ -N197). Residue modified by photolabel derivative is in bold and underlined. Detected identified ions are colored and labeled accordingly. Residues detected with a modification are noted.

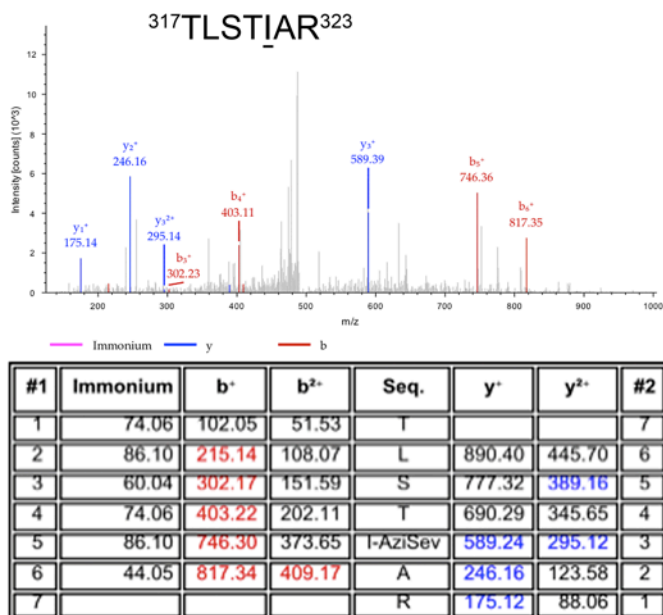

Fig S36. Identification of azisevoflurane adducts within the FLAG- $\alpha_1\beta_3\gamma_{2L}$ -L3-1D4 GABA<sub>A</sub> receptors photolabeled in the presence of 30 $\mu$ M azisevoflurane and 3mM sevoflurane respectively. Mass spectrum and corresponding peptide fragment table of peptides containing azisevoflurane  $\gamma_{2L}$ -I321(D) adduct within the  $\gamma_{2L}$ -L3-1D4 subunit (corresponding with  $\gamma_{2L}$ -I282 in  $\gamma_{2L}$  subunit). Residue modified by photolabel derivative is in bold and underlined. Detected identified ions are colored and labeled accordingly. Residues detected with a modification are noted.
